# Supplementary material for: What are the prospects of [1,2,5]oxadiazolo[3,4-c]cinnoline 5-oxides, 1,5-dioxides and their nitro derivatives as high-energy-density materials? Synthesis, experimental and predicted crystal structures, and calculated explosive properties
Source: Royal Society of Chemistry journal article supplement (doi:10.1039/d3ce00964e), 2023-01-01
Supplement: d3ce00964e1.pdf [file d3ce00964e1.pdf]

**What are the prospects of [1,2,5]oxadiazolo[3,4-c]cinnoline 5-oxides, 1,5-dioxides and their nitro derivatives as high-energy-density materials? Synthesis, experimental and predicted crystal structures, and calculated explosive properties**

Nikita M. Baraboshkin<sup>a</sup>, Victor P. Zelenov<sup>a\*</sup>, Ivan V. Fedyanin<sup>b</sup>

| <b>Table of contents</b>                                                          | <b>Page</b> |
|-----------------------------------------------------------------------------------|-------------|
| Additional information on crystal structure calculations for compounds <b>1–8</b> | 2           |
| Experimental section                                                              | 19          |
| SXRD experiments                                                                  | 20          |
| X-ray experiment details for compound <b>1</b>                                    | 21          |
| X-ray experiment details for compound <b>7</b>                                    | 25          |
| X-ray experiment details for compound <b>6</b>                                    | 35          |
| X-ray experiment details for compound <b>3</b>                                    | 39          |
| X-ray experiment details for compound <b>5</b>                                    | 44          |
| X-ray experiment details for compound <b>8</b>                                    | 50          |
| Molecular volumes and Kitaigorodskii packing indices                              | 54          |
| References                                                                        | 55          |

### Additional information on crystal structure calculations for compounds 1–8

**Table S1** The comparison of various charge models of molecules. MK –Merzh-Kollman; AC – atom centered charge; SC – shifted charge model (XX, YY, ZZ, XY, XZ, YZ – quadrupole moments; RMSD – root mean square deviation; RRMSD – relative root mean square deviation)

| Compound | Model | Dipole moment | XX     | YY     | ZZ    | XY    | XZ    | YZ   | RMSD, kcal mol <sup>-1</sup> | RRMSD, % |
|----------|-------|---------------|--------|--------|-------|-------|-------|------|------------------------------|----------|
| 1        | MK    | 6.3309        | -1.99  | -0.34  | 2.33  | -6.01 | 0.00  | 0.00 | 0.21                         | 3.51     |
|          | AC    | 6.3569        | -2.07  | -0.42  | 2.49  | -5.94 | 0.00  | 0.00 | 0.19                         | 3.19     |
|          | SC    | 6.3773        | -2.17  | -0.42  | 2.59  | -5.93 | 0.00  | 0.00 | 0.04                         | 0.60     |
|          | QM    | 6.3731        | -2.17  | -0.41  | 2.58  | -5.92 | 0.00  | 0.00 | —                            | —        |
| 2        | MK    | 6.7394        | 6.55   | -10.50 | 3.95  | 9.93  | 0.00  | 0.00 | 0.25                         | 3.53     |
|          | AC    | 6.7685        | 6.43   | -10.80 | 4.37  | 9.80  | 0.00  | 0.00 | 0.21                         | 2.97     |
|          | SC    | 6.78          | 6.44   | -11.00 | 4.56  | 9.82  | 0.00  | 0.00 | 0.05                         | 0.66     |
|          | QM    | 6.7756        | 6.43   | -10.97 | 4.54  | 9.81  | 0.00  | 0.00 | —                            | —        |
| 3        | MK    | 3.4974        | -17.82 | 3.69   | 14.13 | -1.95 | 0.00  | 0.00 | 0.24                         | 4.35     |
|          | AC    | 3.5095        | -17.98 | 3.81   | 14.17 | -1.98 | 0.00  | 0.00 | 0.19                         | 3.50     |
|          | SC    | 3.5116        | -18.28 | 3.88   | 14.40 | -2.06 | 0.00  | 0.00 | 0.05                         | 0.82     |
|          | QM    | 3.5113        | -18.24 | 3.88   | 14.37 | -2.06 | 0.00  | 0.00 | —                            | —        |
| 4        | MK    | 2.3017        | -18.93 | 4.84   | 14.08 | 3.98  | 0.00  | 0.00 | 0.26                         | 5.17     |
|          | AC    | 2.4078        | -18.83 | 4.75   | 14.09 | 4.20  | 0.00  | 0.00 | 0.20                         | 4.01     |
|          | SC    | 2.4262        | -18.97 | 4.69   | 14.28 | 4.29  | 0.00  | 0.00 | 0.04                         | 0.83     |
|          | QM    | 2.4289        | -18.95 | 4.70   | 14.25 | 4.28  | 0.00  | 0.00 | —                            | —        |
| 5        | MK    | 5.7968        | -10.50 | 3.65   | 6.85  | 13.12 | 1.07  | 0.37 | 0.27                         | 4.33     |
|          | AC    | 5.8664        | -10.32 | 3.57   | 6.74  | 12.93 | 1.14  | 0.24 | 0.20                         | 3.24     |
|          | SC    | 5.8923        | -10.30 | 3.44   | 6.86  | 12.89 | 1.09  | 0.28 | 0.05                         | 0.87     |
|          | QM    | 5.8893        | -10.29 | 3.44   | 6.85  | 12.86 | 1.08  | 0.29 | —                            | —        |
| 6        | MK    | 1.2696        | -9.25  | -8.32  | 17.58 | -0.91 | -1.46 | 0.62 | 0.27                         | 5.11     |
|          | AC    | 1.3592        | -9.39  | -8.21  | 17.60 | -0.98 | -1.38 | 0.76 | 0.21                         | 3.94     |
|          | SC    | 1.3807        | -9.72  | -8.11  | 17.83 | -1.07 | -1.36 | 0.69 | 0.04                         | 0.83     |
|          | QM    | 1.381         | -9.71  | -8.09  | 17.80 | -1.07 | -1.36 | 0.68 | —                            | —        |
| 7        | MK    | 5.9936        | -6.73  | 2.75   | 3.99  | -7.80 | 0.00  | 0.00 | 0.16                         | 2.78     |
|          | AC    | 6.0132        | -6.51  | 2.52   | 3.99  | -7.67 | 0.00  | 0.00 | 0.14                         | 2.43     |
|          | SC    | 6.0261        | -6.49  | 2.49   | 4.00  | -7.65 | 0.00  | 0.00 | 0.04                         | 0.64     |

|          |    |        |        |       |       |       |      |      |      |      |
|----------|----|--------|--------|-------|-------|-------|------|------|------|------|
|          | QM | 6.0225 | -6.48  | 2.49  | 3.98  | -7.63 | 0.00 | 0.00 | —    | —    |
| <b>8</b> | MK | 2.8656 | -10.09 | -5.89 | 15.99 | 8.56  | 0.00 | 0.00 | 0.17 | 3.21 |
|          | AC | 2.8894 | -10.27 | -5.71 | 15.98 | 8.63  | 0.00 | 0.00 | 0.15 | 2.73 |
|          | SC | 2.8938 | -10.40 | -5.70 | 16.10 | 8.76  | 0.00 | 0.00 | 0.05 | 0.84 |
|          | QM | 2.8935 | -10.37 | -5.69 | 16.06 | 8.76  | 0.00 | 0.00 | —    | —    |

Fig. S1 Illustration of atomic charge model AC (left) and SC (right)

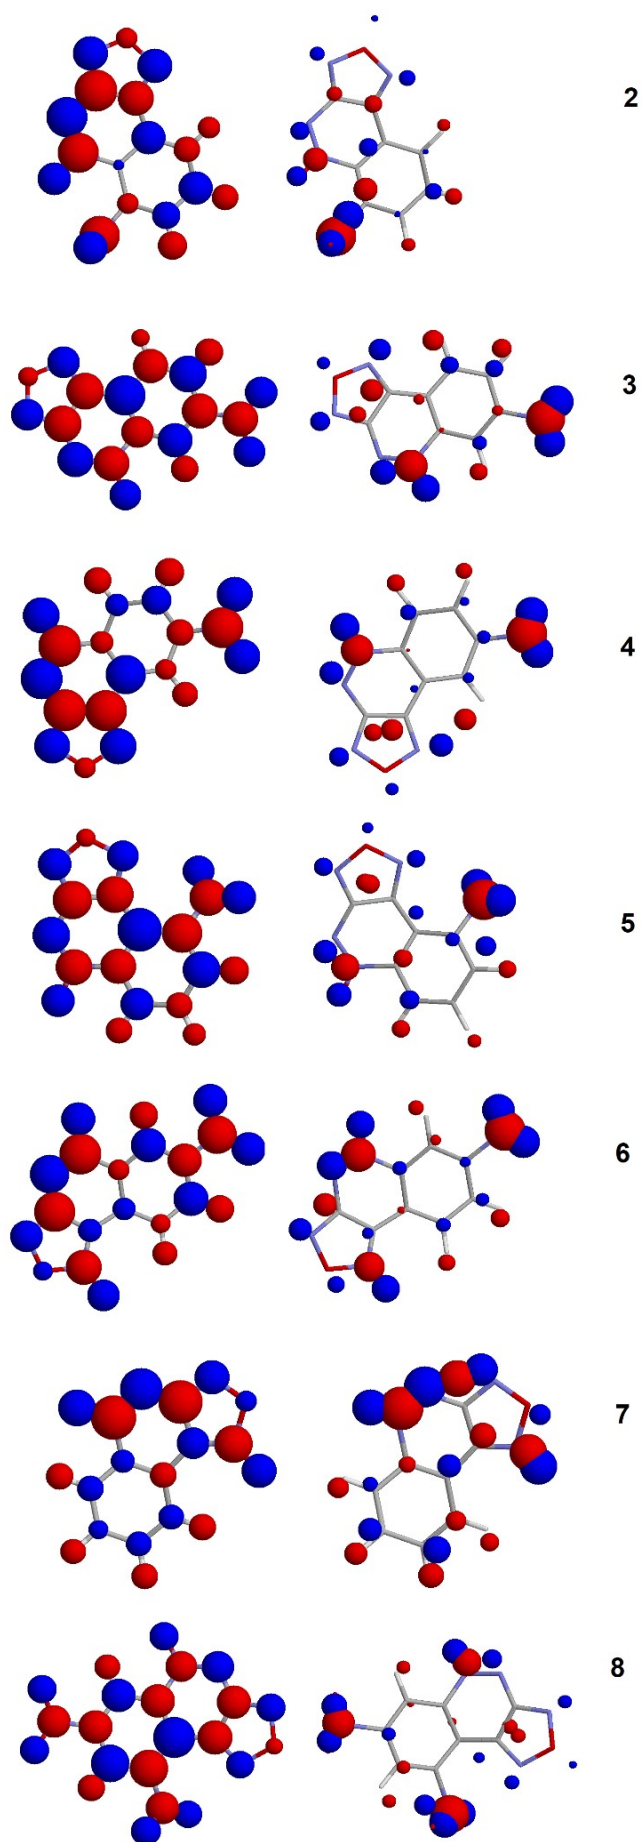

**Fig. S2** Cluster of 13 molecules of compound **1**

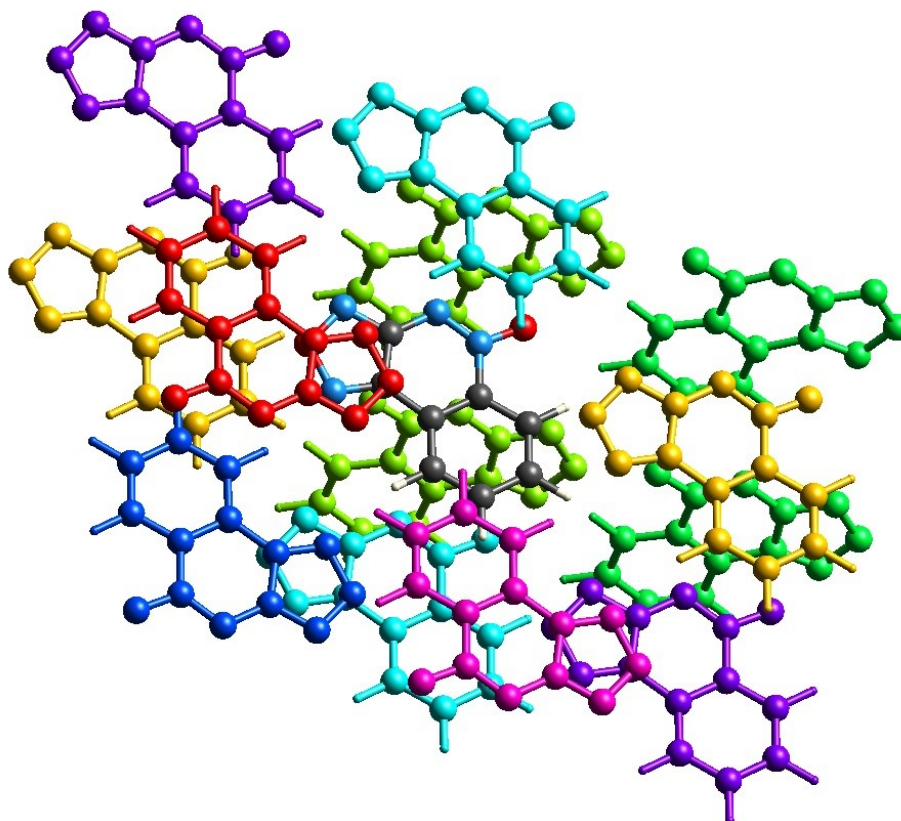

**Table S2** Intermolecular interaction energy of 13 molecules cluster of compound **1**<sup>a</sup>

|                                                 | N | Symop             | R    | E_ele,<br>kcal·mol <sup>-1</sup> | E_pol,<br>kcal·mol <sup>-1</sup> | E_dis,<br>kcal·mol <sup>-1</sup> | E_rep,<br>kcal·mol <sup>-1</sup> | E_tot,<br>kcal·mol <sup>-1</sup> |
|-------------------------------------------------|---|-------------------|------|----------------------------------|----------------------------------|----------------------------------|----------------------------------|----------------------------------|
|                                                 | 1 | -x, -y, -z        | 5.78 | -3.35                            | -0.38                            | -5.38                            | 3.39                             | -6.41                            |
|                                                 | 2 | x, y, z           | 7.74 | 0.24                             | -0.48                            | -5.31                            | 2.92                             | -2.96                            |
|                                                 | 2 | -x, y+1/2, -z+1/2 | 5.09 | -5.54                            | -2.06                            | -11.62                           | 9.99                             | -11.33                           |
|                                                 | 2 | -x, y+1/2, -z+1/2 | 8.32 | -3.54                            | -1.29                            | -5.59                            | 5.98                             | -5.88                            |
|                                                 | 2 | x, y, z           | 5.37 | 0.91                             | -1.20                            | -12.19                           | 6.36                             | -6.64                            |
|                                                 | 1 | -x, -y, -z        | 7.16 | -5.74                            | -0.84                            | -2.82                            | 5.14                             | -5.98                            |
|                                                 | 2 | x, y, z           | 9.43 | -5.78                            | -1.00                            | -3.68                            | 4.73                             | -7.12                            |
|                                                 | 1 | -x, -y, -z        | 8.42 | 0.53                             | -0.33                            | -2.51                            | 1.53                             | -0.96                            |
| Total energy of cluster, kcal·mol <sup>-1</sup> |   |                   |      | -22.28                           | -7.58                            | -49.09                           | 40.03                            | -47.28                           |

<sup>a</sup> **Hereinafter:** Calculations were performed by B3LYP/6-31G(d,p) functional; N – number of interacting molecules; Symop – symmetry operations relating that particular colour coded molecule with the central molecule; R – distance between molecules center of mass; E\_ele – energy of electrostatic interaction; E\_pol – energy of polarization interaction; E\_dis – energy of dispersion interaction; E\_tot – total interaction energy.

**Fig. S3** Cluster of 13 molecules of compound 7 asymmetric unit molecule A

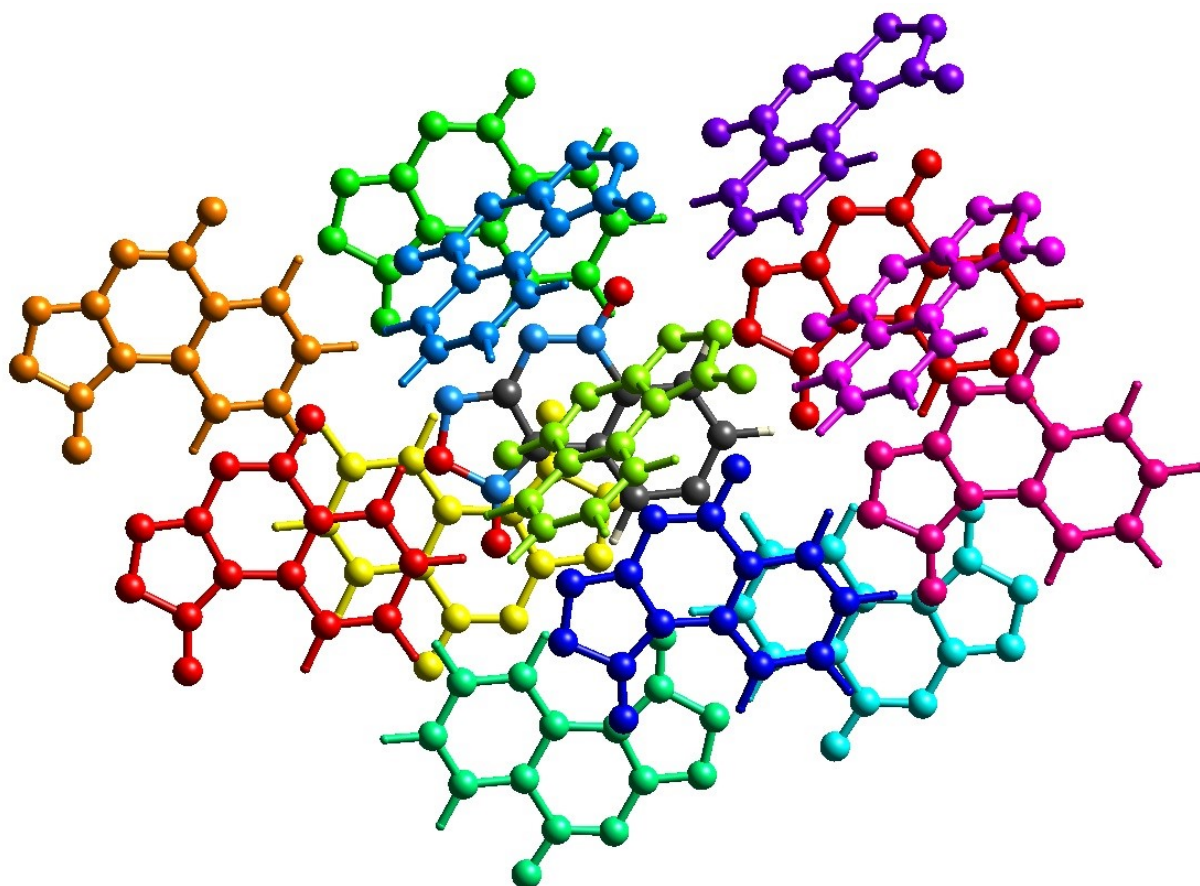

**Table S3** Intermolecular interaction energy of 13 molecules cluster of compound 7 asymmetric unit molecule A

|  | N | Symop      | R    | $E_{ele}$ ,<br>kcal·mol <sup>-1</sup> | $E_{pol}$ ,<br>kcal·mol <sup>-1</sup> | $E_{dis}$ ,<br>kcal·mol <sup>-1</sup> | $E_{rep}$ ,<br>kcal·mol <sup>-1</sup> | $E_{tot}$ ,<br>kcal·mol <sup>-1</sup> |
|--|---|------------|------|---------------------------------------|---------------------------------------|---------------------------------------|---------------------------------------|---------------------------------------|
|  | 2 | x, y, z    | 8.1  | 0.05                                  | -0.48                                 | -5.11                                 | 2.68                                  | -3.11                                 |
|  | 1 | —          | 9.58 | -2.70                                 | -0.43                                 | -1.58                                 | 2.39                                  | -3.06                                 |
|  | 1 | -x, -y, -z | 4.79 | -3.04                                 | -0.65                                 | -8.82                                 | 5.04                                  | -8.25                                 |
|  | 1 | —          | 5.04 | -3.08                                 | -1.12                                 | -7.24                                 | 6.26                                  | -6.52                                 |
|  | 1 | —          | 5.68 | 0.07                                  | -0.60                                 | -5.43                                 | 2.92                                  | -3.27                                 |
|  | 1 | —          | 7.52 | -4.83                                 | -0.79                                 | -3.25                                 | 4.18                                  | -5.93                                 |
|  | 1 | —          | 9.61 | 0.98                                  | -0.29                                 | -1.53                                 | 0.79                                  | -0.02                                 |
|  | 1 | —          | 5.21 | -2.01                                 | -0.91                                 | -6.02                                 | 4.37                                  | -5.33                                 |

|                                                 |   |   |      |        |       |        |       |        |
|-------------------------------------------------|---|---|------|--------|-------|--------|-------|--------|
|                                                 | 1 | — | 5.25 | 0.29   | -0.67 | -7.29  | 3.73  | -4.25  |
|                                                 | 1 | — | 8.96 | -1.15  | -0.45 | -2.06  | 1.27  | -2.56  |
|                                                 | 1 | — | 8.67 | -1.79  | -0.60 | -2.65  | 2.68  | -3.01  |
|                                                 | 1 | — | 9.79 | -2.34  | -0.33 | -1.39  | 1.70  | -2.87  |
| Total energy of cluster, kcal·mol <sup>-1</sup> |   |   |      | -19.55 | -7.31 | -52.37 | 38.00 | -48.18 |

**Fig. S4** Cluster of 13 molecules of compound 7 asymmetric unit molecule B

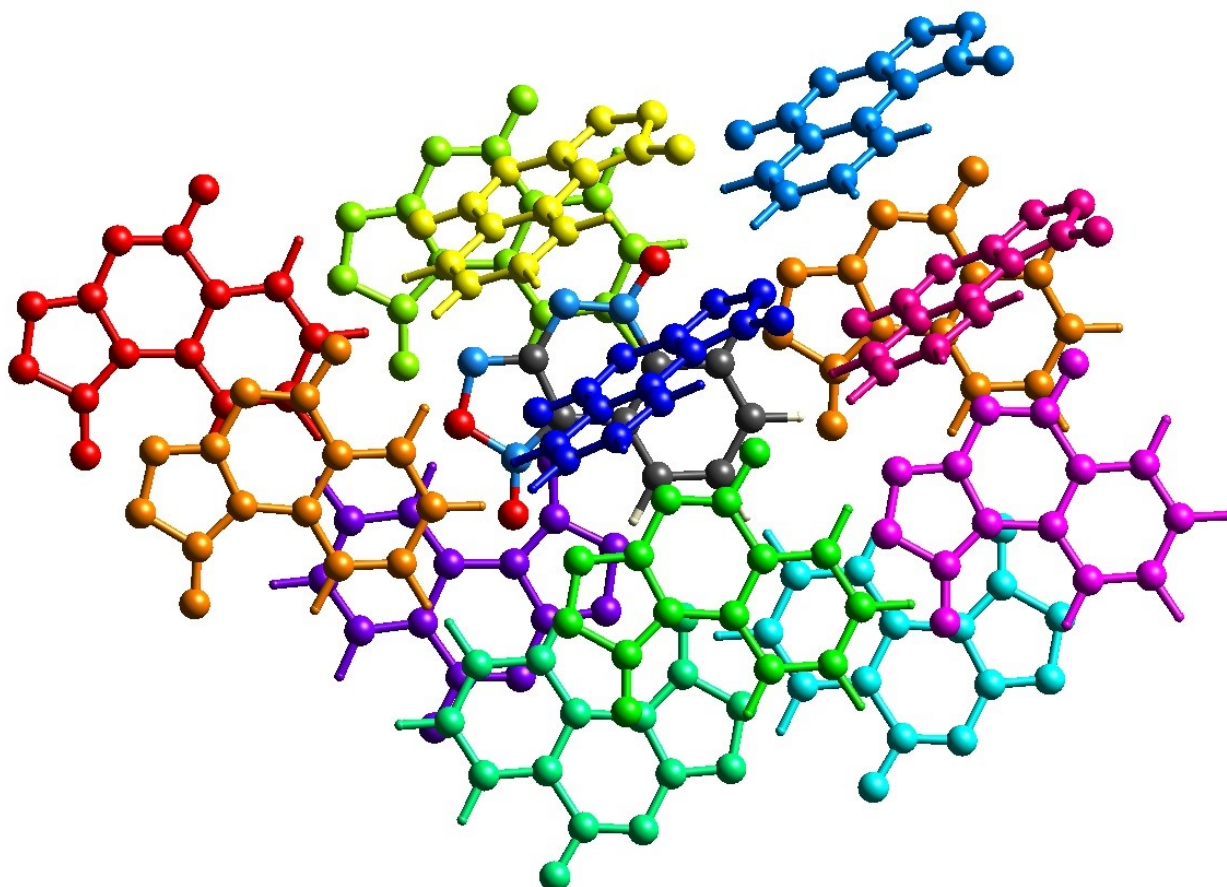

**Table S4** Intermolecular interaction energy of 13 molecules cluster of compound 7 asymmetric unit molecule B

|  | N | Symop   | R    | E_ele,<br>kcal·mol <sup>-1</sup> | E_pol,<br>kcal·mol <sup>-1</sup> | E_dis,<br>kcal·mol <sup>-1</sup> | E_rep,<br>kcal·mol <sup>-1</sup> | E_tot,<br>kcal·mol <sup>-1</sup> |
|--|---|---------|------|----------------------------------|----------------------------------|----------------------------------|----------------------------------|----------------------------------|
|  | 1 | —       | 9.71 | -2.58                            | -0.36                            | -1.58                            | 2.15                             | -3.04                            |
|  | 2 | x, y, z | 8.1  | 0.00                             | -0.48                            | -5.21                            | 2.68                             | -3.25                            |
|  | 1 | —       | 5.04 | -3.08                            | -1.12                            | -7.24                            | 6.26                             | -6.52                            |
|  | 1 | —       | 5.02 | -0.45                            | -0.76                            | -8.58                            | 5.33                             | -5.23                            |

|                                                 |   |   |        |       |        |       |        |       |
|-------------------------------------------------|---|---|--------|-------|--------|-------|--------|-------|
|                                                 | 1 | — | 5.68   | 0.07  | -0.60  | -5.43 | 2.92   | -3.27 |
|                                                 | 1 | — | 7.52   | -4.83 | -0.79  | -3.25 | 4.18   | -5.93 |
|                                                 | 1 | — | 9.61   | 0.98  | -0.29  | -1.53 | 0.79   | -0.02 |
|                                                 | 1 | — | 8.67   | -1.79 | -0.60  | -2.65 | 2.68   | -3.01 |
|                                                 | 1 | — | 5.08   | -3.80 | -1.20  | -7.36 | 7.03   | -6.98 |
|                                                 | 1 | — | 5.69   | -3.90 | -0.60  | -6.52 | 4.66   | -7.34 |
|                                                 | 1 | — | 9.58   | -2.70 | -0.43  | -1.58 | 2.39   | -3.06 |
|                                                 | 1 | — | 8.54   | -2.39 | -0.69  | -3.04 | 3.94   | -3.25 |
| Total energy of cluster, kcal·mol <sup>-1</sup> |   |   | -24.47 | -7.91 | -53.97 | 45.00 | -50.91 |       |

**Fig. S4** Cluster of 13 molecules of compound **7** asymmetric unit molecule B

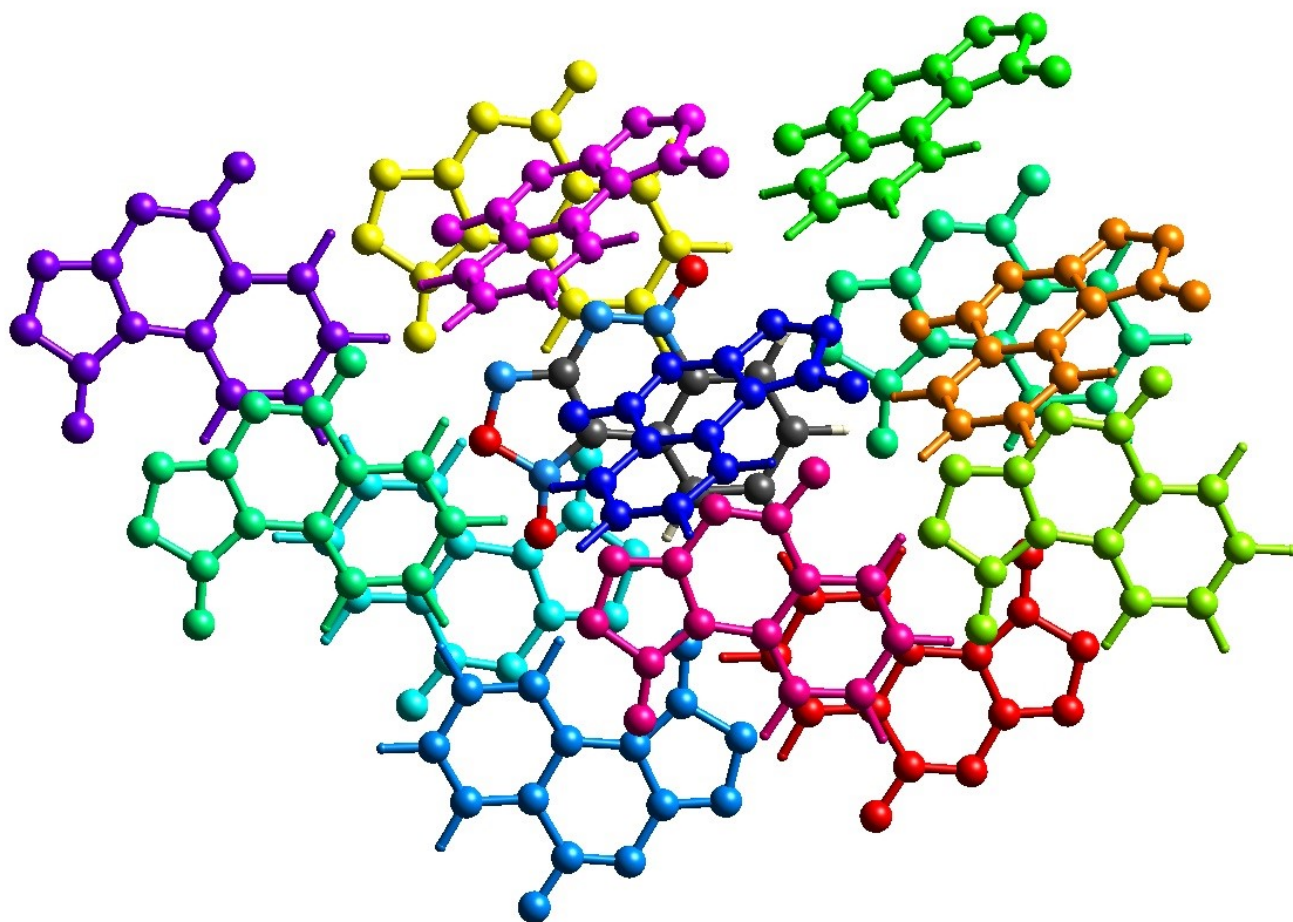



**Fig. S5** Cluster of 13 molecules of compound 7 asymmetric unit molecule C

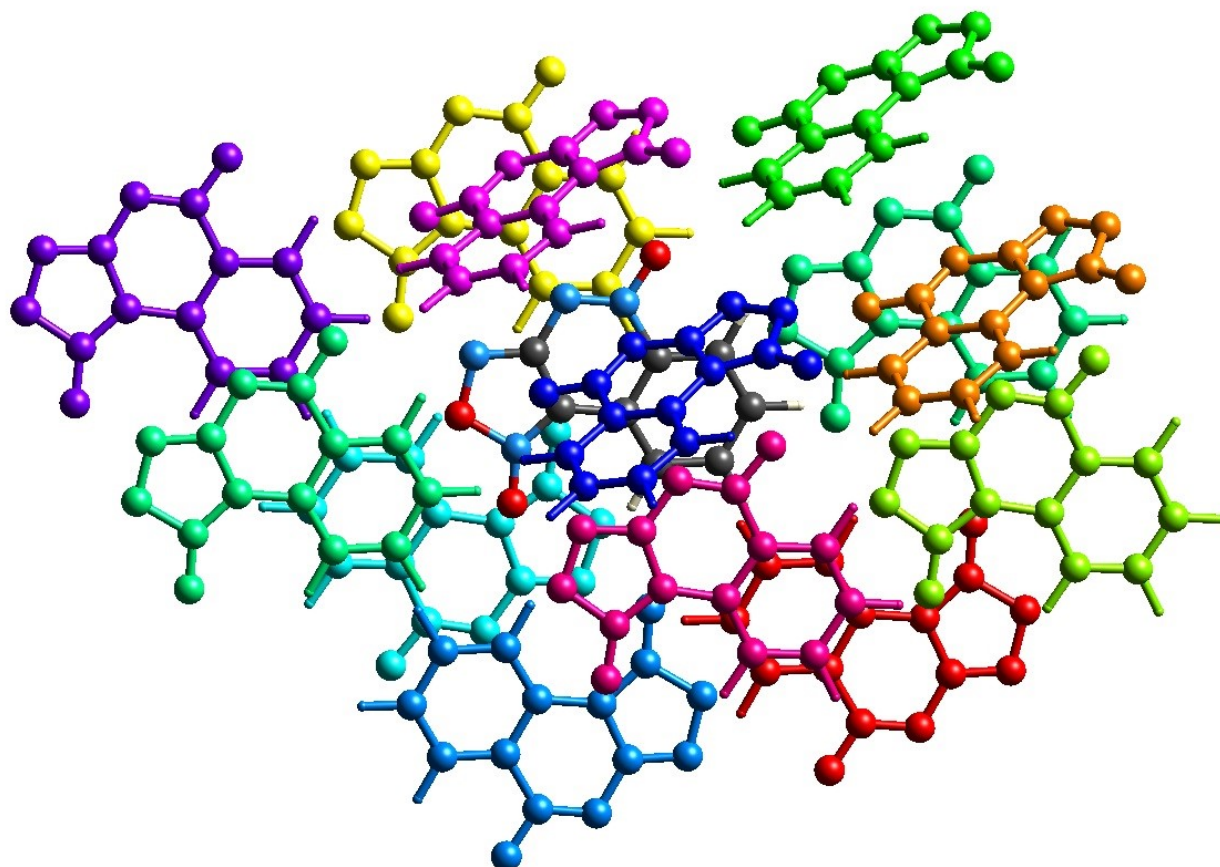

**Table S5** Intermolecular interaction energy of 13 molecules cluster of compound 7 asymmetric unit molecule C

|  | N | Symop      | R    | E <sub>ele</sub> ,<br>kcal·mol <sup>-1</sup> | E <sub>pol</sub> ,<br>kcal·mol <sup>-1</sup> | E <sub>dis</sub> ,<br>kcal·mol <sup>-1</sup> | E <sub>rep</sub> ,<br>kcal·mol <sup>-1</sup> | E <sub>tot</sub> ,<br>kcal·mol <sup>-1</sup> |
|--|---|------------|------|----------------------------------------------|----------------------------------------------|----------------------------------------------|----------------------------------------------|----------------------------------------------|
|  | 1 | -x, -y, -z | 9.73 | 0.96                                         | -0.24                                        | -1.10                                        | 0.38                                         | 0.12                                         |
|  | 1 | —          | 8.96 | -1.15                                        | -0.45                                        | -2.06                                        | 1.27                                         | -2.56                                        |
|  | 1 | —          | 5.25 | 0.29                                         | -0.67                                        | -7.29                                        | 3.73                                         | -4.25                                        |
|  | 1 | —          | 9.71 | -2.58                                        | -0.36                                        | -1.58                                        | 2.15                                         | -3.04                                        |
|  | 1 | —          | 8.54 | -2.39                                        | -0.69                                        | -3.04                                        | 3.94                                         | -3.25                                        |
|  | 2 | x, y, z    | 8.1  | -0.05                                        | -0.48                                        | -5.26                                        | 2.82                                         | -3.25                                        |
|  | 1 | —          | 5.69 | -3.90                                        | -0.60                                        | -6.52                                        | 4.66                                         | -7.34                                        |
|  | 1 | -x, -y, -z | 7.62 | -4.92                                        | -0.67                                        | -2.56                                        | 4.33                                         | -5.26                                        |
|  | 1 | —          | 5.21 | -2.01                                        | -0.91                                        | -6.02                                        | 4.37                                         | -5.33                                        |

|                                                 |   |   |      |        |       |        |       |        |
|-------------------------------------------------|---|---|------|--------|-------|--------|-------|--------|
|                                                 | 1 | — | 9.79 | -2.34  | -0.33 | -1.39  | 1.70  | -2.87  |
|                                                 | 1 | — | 5.08 | -3.80  | -1.20 | -7.36  | 7.03  | -6.98  |
|                                                 | 1 | — | 5.02 | -0.45  | -0.76 | -8.58  | 5.33  | -5.23  |
| Total energy of cluster, kcal·mol <sup>-1</sup> |   |   |      | -22.35 | -7.36 | -52.75 | 41.71 | -49.24 |

**Fig. S6** Cluster of 14 molecules of compound **6**

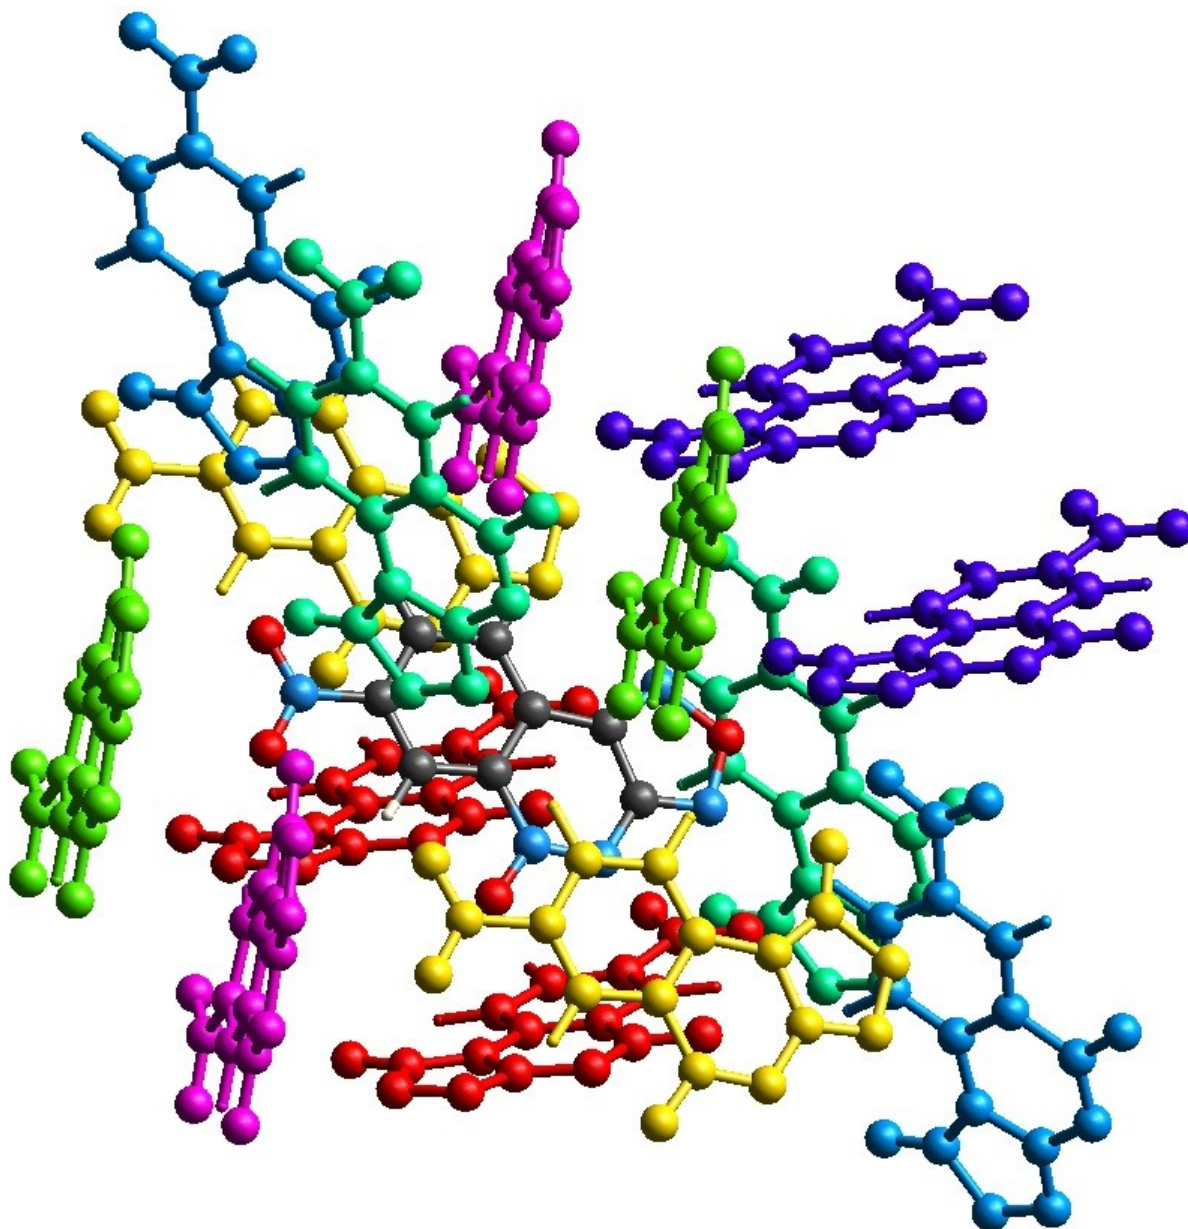

**Table S6** Intermolecular interaction energy of 14 molecules cluster of compound **6**

|                                                 | N | Symop                   | R    | E_ele,<br>kcal·mol <sup>-1</sup> | E_pol,<br>kcal·mol <sup>-1</sup> | E_dis,<br>kcal·mol <sup>-1</sup> | E_rep,<br>kcal·mol <sup>-1</sup> | E_tot,<br>kcal·mol <sup>-1</sup> |
|-------------------------------------------------|---|-------------------------|------|----------------------------------|----------------------------------|----------------------------------|----------------------------------|----------------------------------|
|                                                 | 2 | -x, -y, z+1/2           | 5.10 | -6.74                            | -2.25                            | -15.49                           | 14.05                            | -13.58                           |
|                                                 | 2 | x, y, z                 | 6.14 | -1.24                            | -1.53                            | -11.57                           | 7.41                             | -7.98                            |
|                                                 | 2 | -x+1/2, y+1/2,<br>z+1/2 | 7.42 | -7.31                            | -1.48                            | -9.99                            | 10.76                            | -10.90                           |
|                                                 | 2 | x+1/2, -y+1/2, z        | 7.58 | -1.43                            | -0.62                            | -7.07                            | 5.31                             | -4.88                            |
|                                                 | 2 | x+1/2, -y+1/2, z        | 9.76 | -2.87                            | -0.48                            | -3.35                            | 2.63                             | -4.64                            |
|                                                 | 2 | -x, -y, z+1/2           | 8.71 | -3.25                            | -0.33                            | -3.78                            | 1.29                             | -6.17                            |
|                                                 | 2 | -x+1/2, y+1/2,<br>z+1/2 | 7.42 | -4.35                            | -1.00                            | -6.17                            | 6.55                             | -6.69                            |
| Total energy of cluster, kcal·mol <sup>-1</sup> |   |                         |      | -27.20                           | -7.70                            | -57.41                           | 47.99                            | -54.83                           |

**Fig. S7** Cluster of 14 molecules of compound **3**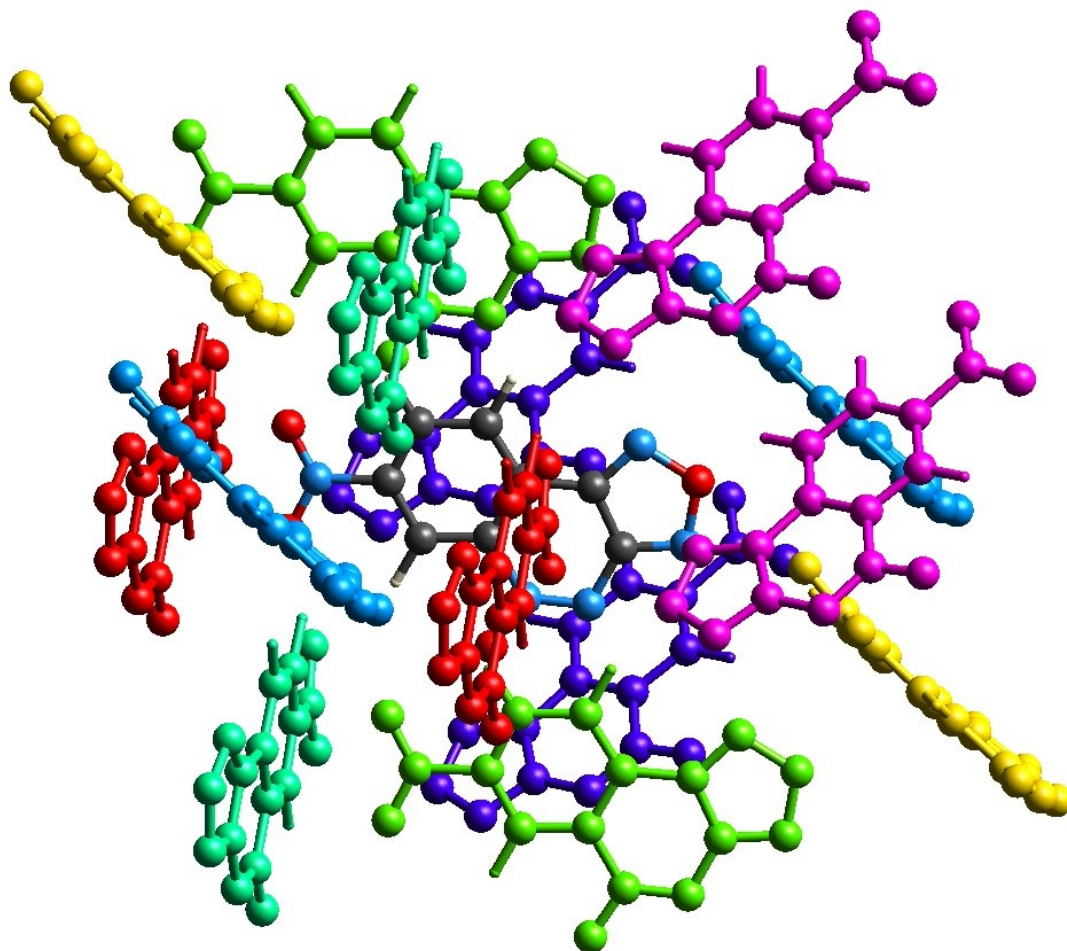

**Table S7** Intermolecular interaction energy of 14 molecules cluster of compounds **3**

|                                                 | N | Symop                | R    | E_ele,<br>kcal·<br>mol <sup>-1</sup> | E_pol,<br>kcal·<br>mol <sup>-1</sup> | E_dis,<br>kcal·<br>mol <sup>-1</sup> | E_rep,<br>kcal·<br>mol <sup>-1</sup> | E_tot,<br>kcal·<br>mol <sup>-1</sup> |
|-------------------------------------------------|---|----------------------|------|--------------------------------------|--------------------------------------|--------------------------------------|--------------------------------------|--------------------------------------|
|                                                 | 2 | -x+1/2, y+1/2, z+1/2 | 7.18 | -5.83                                | -1.29                                | -9.32                                | 9.18                                 | -9.61                                |
|                                                 | 2 | x+1/2, -y+1/2, z     | 9.91 | -2.49                                | -0.53                                | -3.25                                | 3.35                                 | -3.82                                |
|                                                 | 2 | x, y, z              | 6.39 | -0.76                                | -1.39                                | -9.42                                | 5.50                                 | -6.64                                |
|                                                 | 2 | -x+1/2, y+1/2, z+1/2 | 7.18 | -4.25                                | -1.00                                | -6.31                                | 6.45                                 | -6.74                                |
|                                                 | 2 | x+1/2, -y+1/2, z     | 7.57 | -1.91                                | -0.62                                | -6.64                                | 4.21                                 | -5.64                                |
|                                                 | 2 | -x, -y, z+1/2        | 5.10 | -5.98                                | -2.15                                | -14.96                               | 13.15                                | -12.81                               |
|                                                 | 2 | -x, -y, z+1/2        | 8.74 | -2.01                                | -0.29                                | -2.49                                | 0.33                                 | -4.35                                |
| Total energy of cluster, kcal·mol <sup>-1</sup> |   |                      |      | -23.23                               | -7.27                                | -52.39                               | 42.16                                | -49.62                               |

**Fig. S8** Cluster of 12 molecules of compound 5

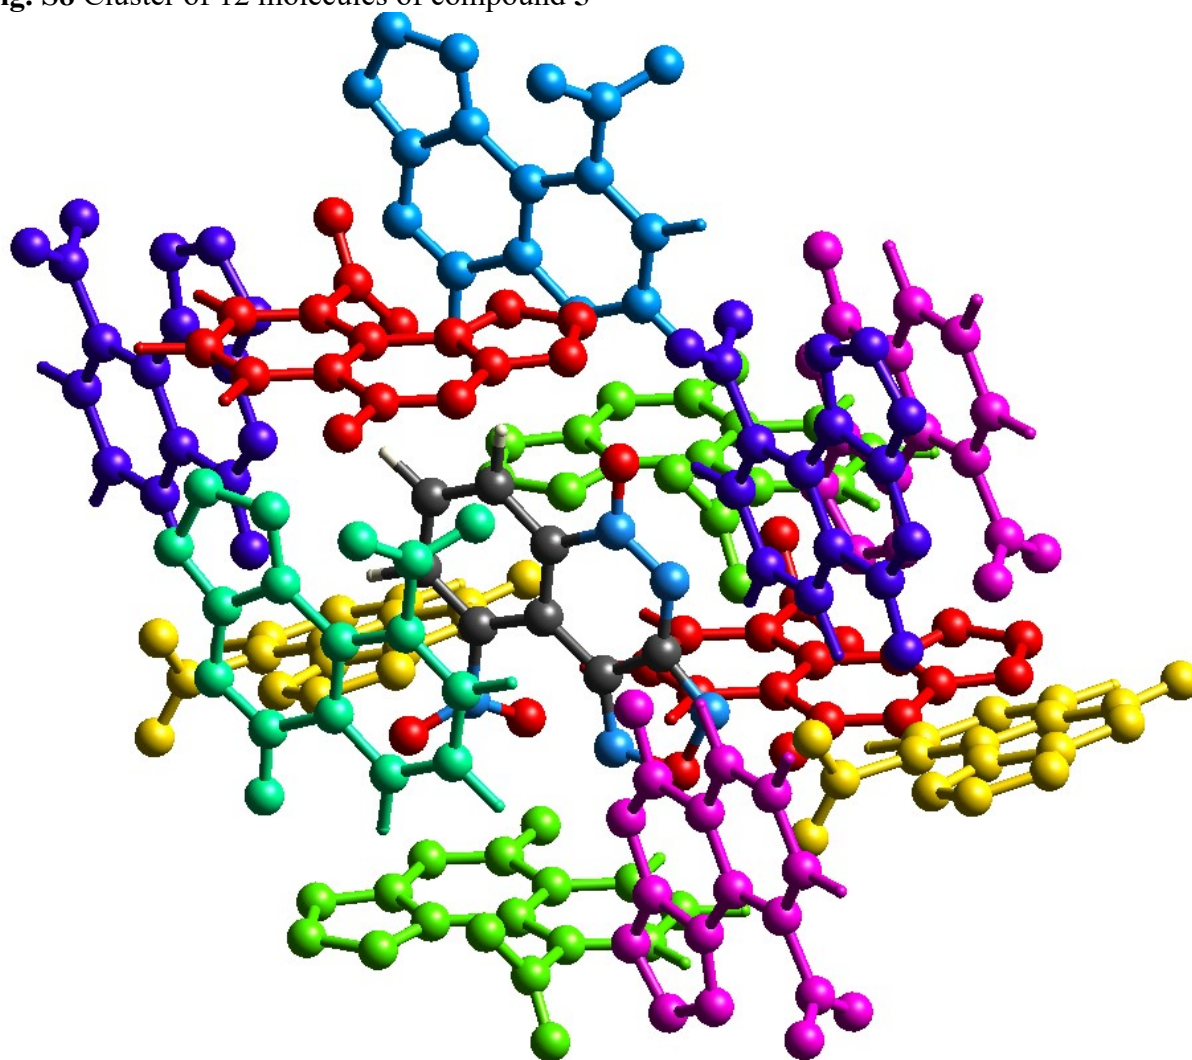

**Table S8** Energy of 12 molecules cluster of compounds 5

|                                                 | N | Symop               | R    | E_ele,<br>kcal·<br>mol <sup>-1</sup> | E_pol,<br>kcal·<br>mol <sup>-1</sup> | E_dis,<br>kcal·<br>mol <sup>-1</sup> | E_rep,<br>kcal·<br>mol <sup>-1</sup> | E_tot,<br>kcal·<br>mol <sup>-1</sup> |
|-------------------------------------------------|---|---------------------|------|--------------------------------------|--------------------------------------|--------------------------------------|--------------------------------------|--------------------------------------|
|                                                 | 2 | $-x+1/2, y+1/2, z$  | 6.79 | -2.58                                | -1.39                                | -7.84                                | 6.31                                 | -6.69                                |
|                                                 | 2 | $x, -y+1/2, z+1/2$  | 8.29 | -3.87                                | -1.10                                | -5.74                                | 7.89                                 | -5.07                                |
|                                                 | 2 | $x+1/2, -y+1/2, -z$ | 5.44 | -9.94                                | -1.91                                | -14.10                               | 11.81                                | -16.92                               |
|                                                 | 1 | $-x, -y, -z$        | 4.33 | -1.91                                | -1.74                                | -13.86                               | 10.13                                | -9.13                                |
|                                                 | 1 | $-x, -y, -z$        | 7.76 | -1.53                                | -0.74                                | -4.33                                | 3.32                                 | -3.92                                |
|                                                 | 2 | $-x+1/2, -y, z+1/2$ | 8.87 | -8.32                                | -1.63                                | -5.31                                | 6.17                                 | -10.85                               |
|                                                 | 2 | $x+1/2, y, -z+1/2$  | 7.5  | -2.49                                | -0.53                                | -5.11                                | 1.82                                 | -6.31                                |
| Total energy of cluster, kcal·mol <sup>-1</sup> |   |                     |      | -30.64                               | -9.03                                | -56.29                               | 47.44                                | -58.89                               |

**Fig. S9** Relationship "Lattice energy–Density" and "Lattice energy–Energy of electrostatic interactions" for the 50 deepest minima obtained as a result of scanning PES compounds **2**, **4**, **8**

**Compound 2**

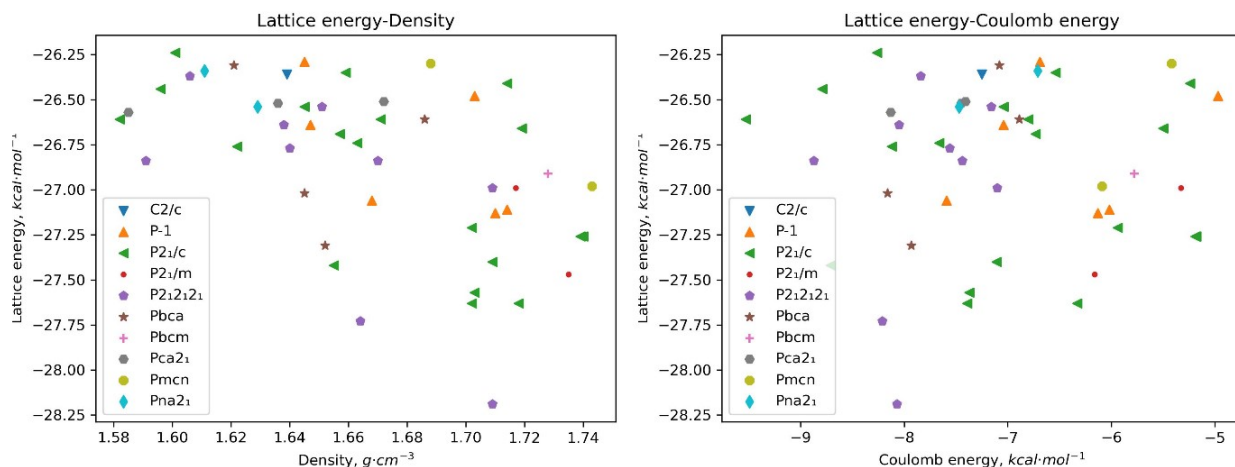

**Compound 4**

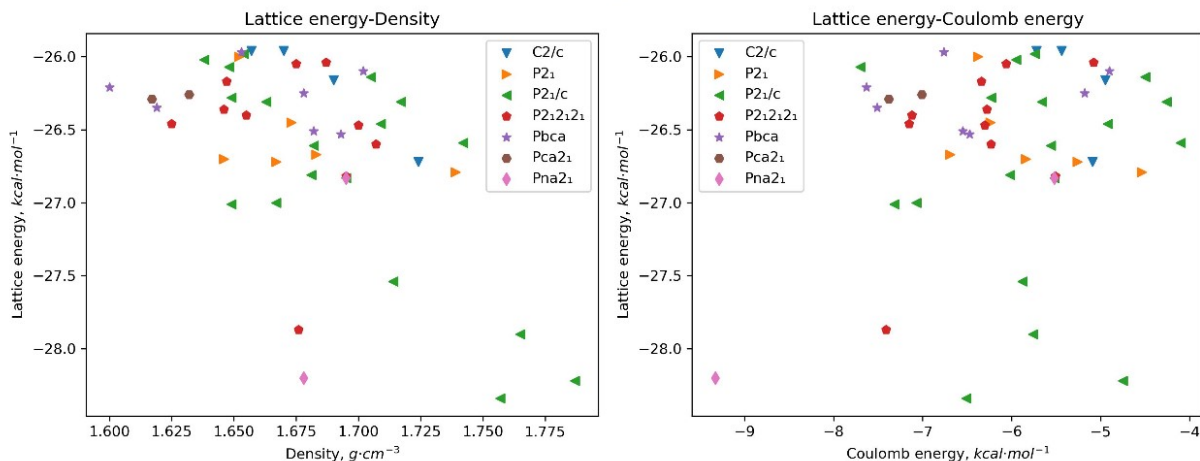

**Compound 8**

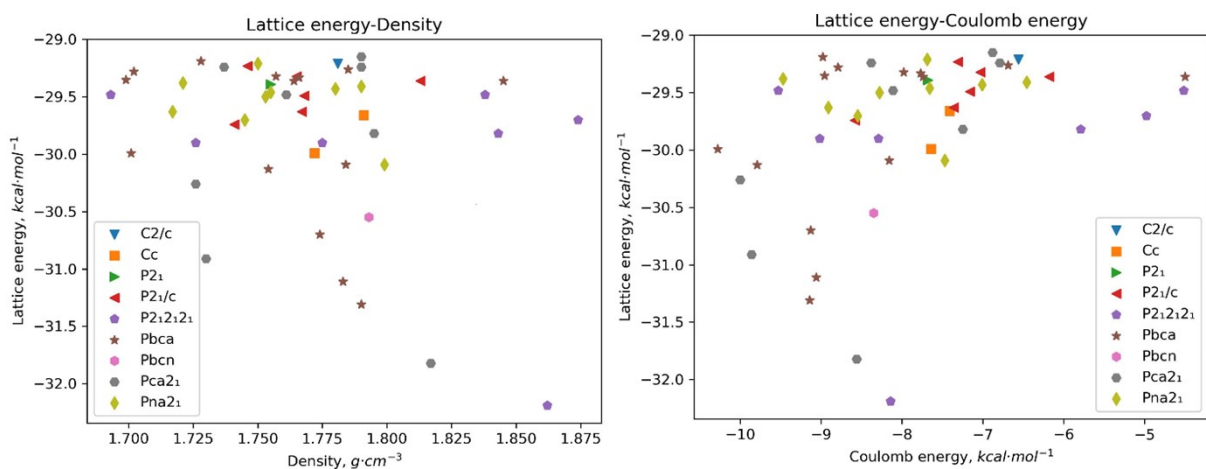

**Fig. S10** 2D fingerprint plots of Hirshfeld surface of main close contacts for compound **1**.

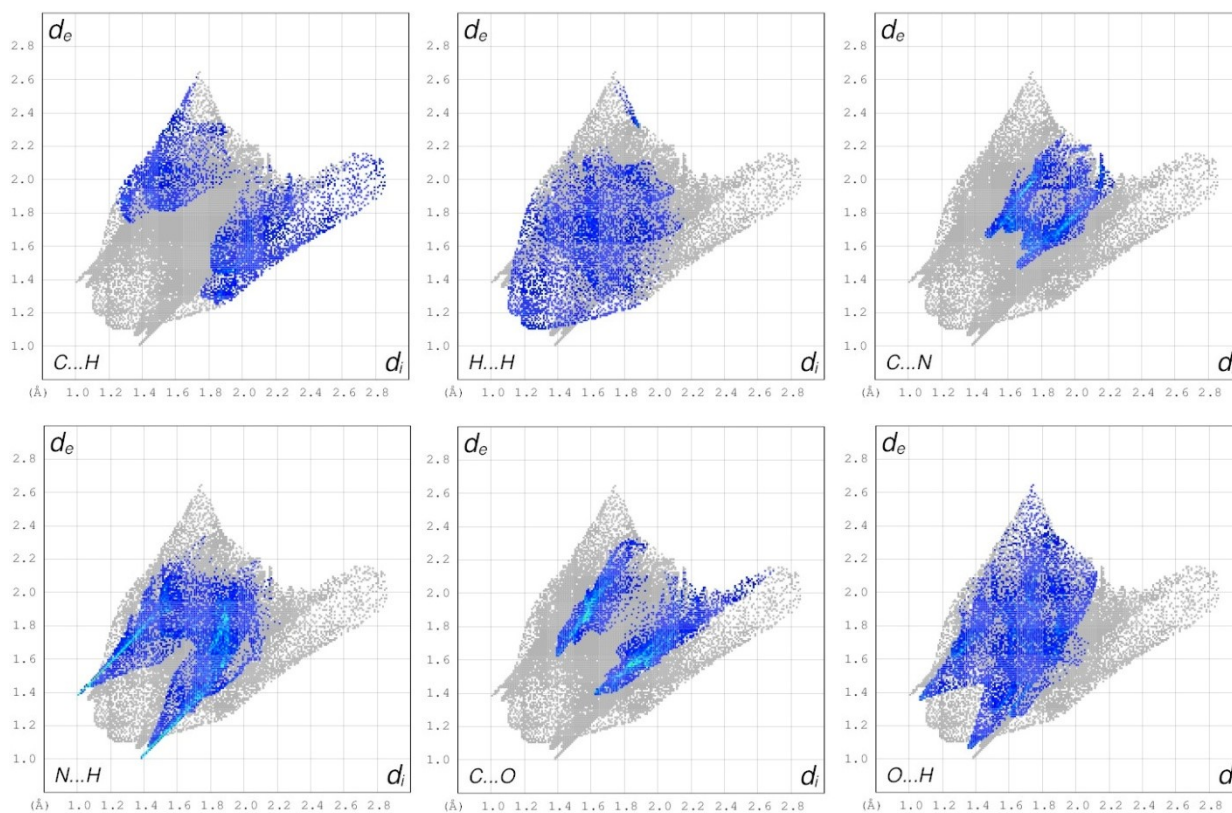

**Fig. S11** 2D fingerprint plots of Hirshfeld surface of main close contacts for compound **3**.

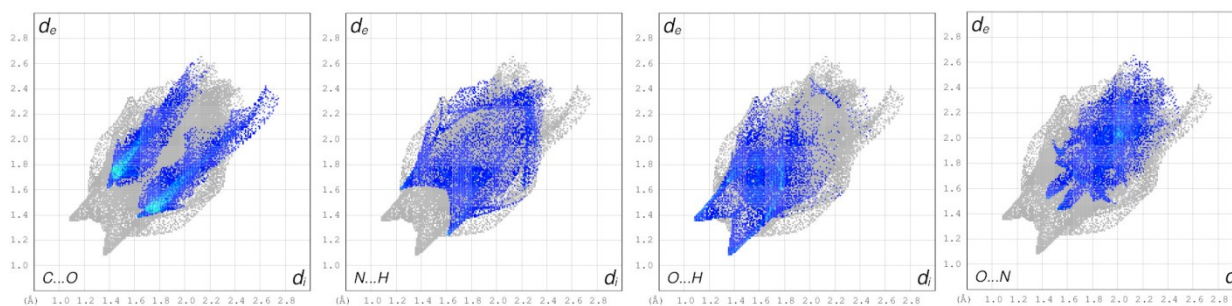

**Fig. S12** 2D fingerprint plots of Hirshfeld surface of main close contacts for compound **6**.

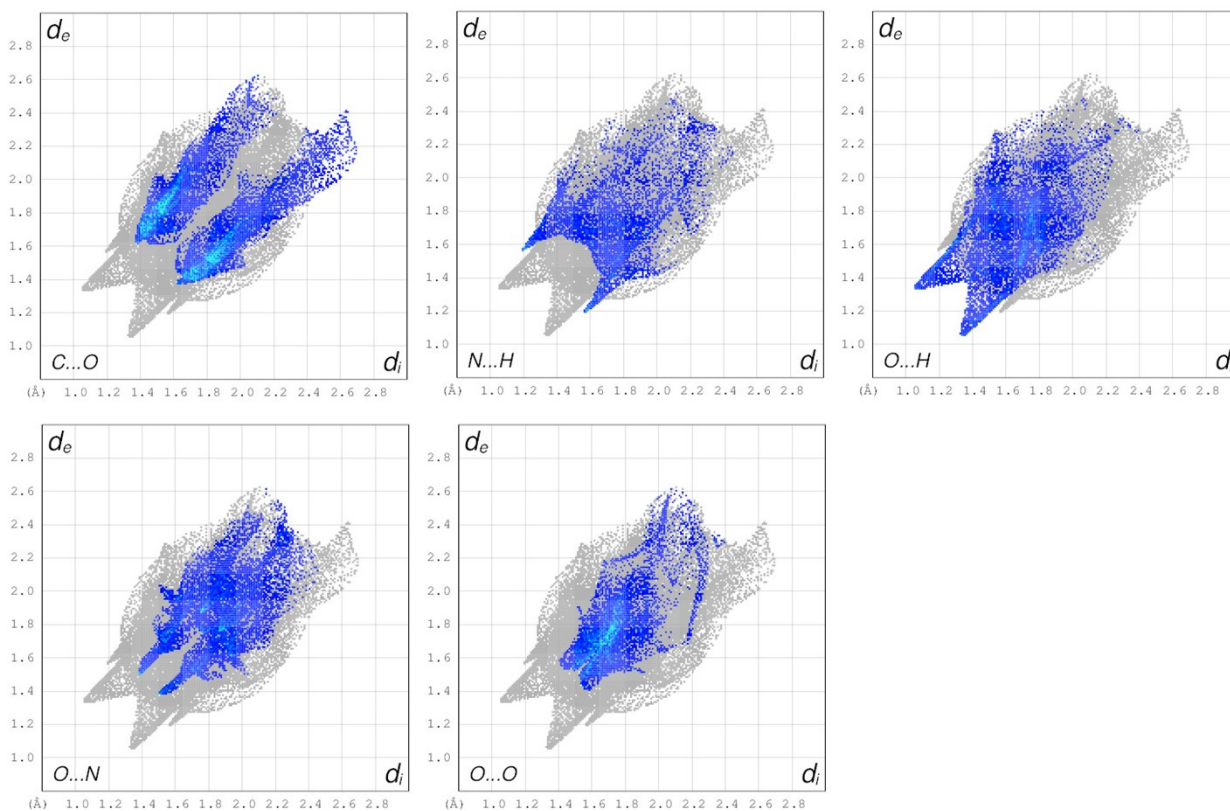

**Fig. S13** 2D fingerprint plots of Hirshfeld surface of main close contacts for compound **5**.

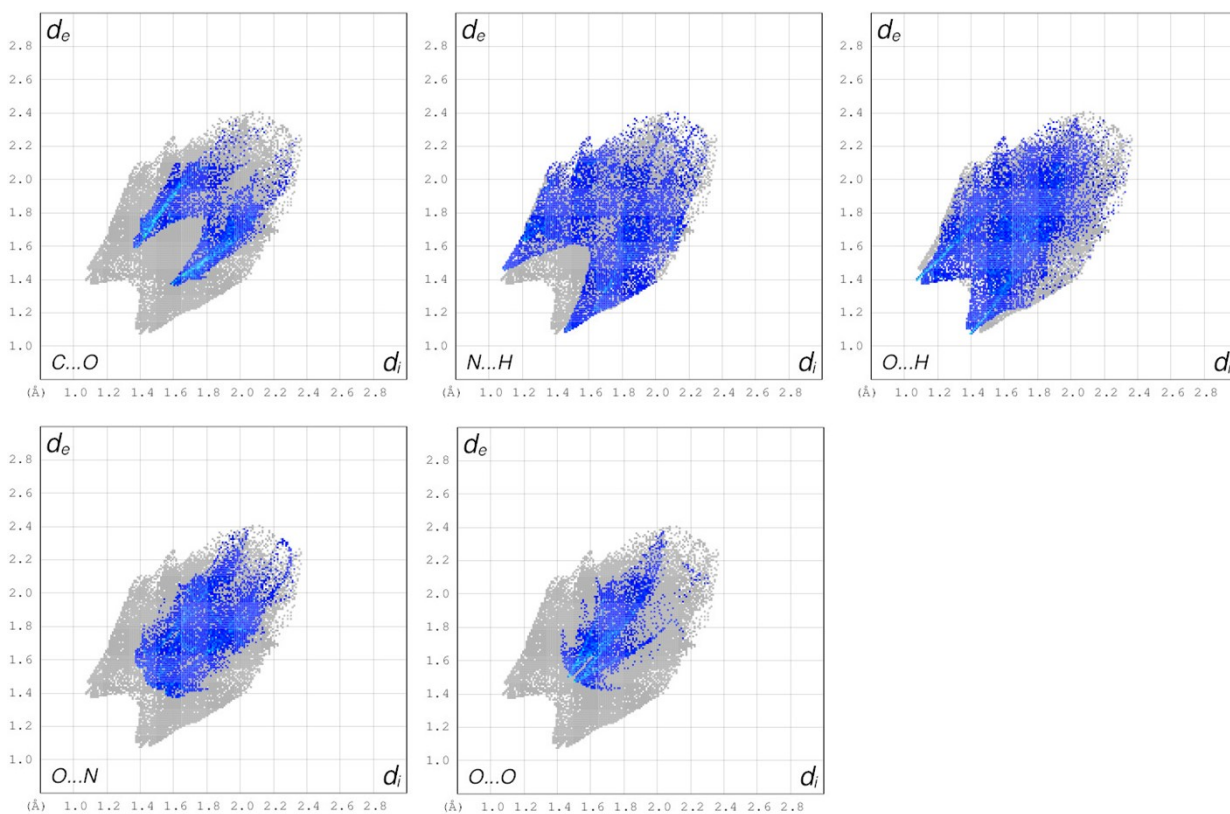



**Fig. S14** 2D fingerprint plots of Hirshfeld surface of main close contacts for compound 7.

**A**

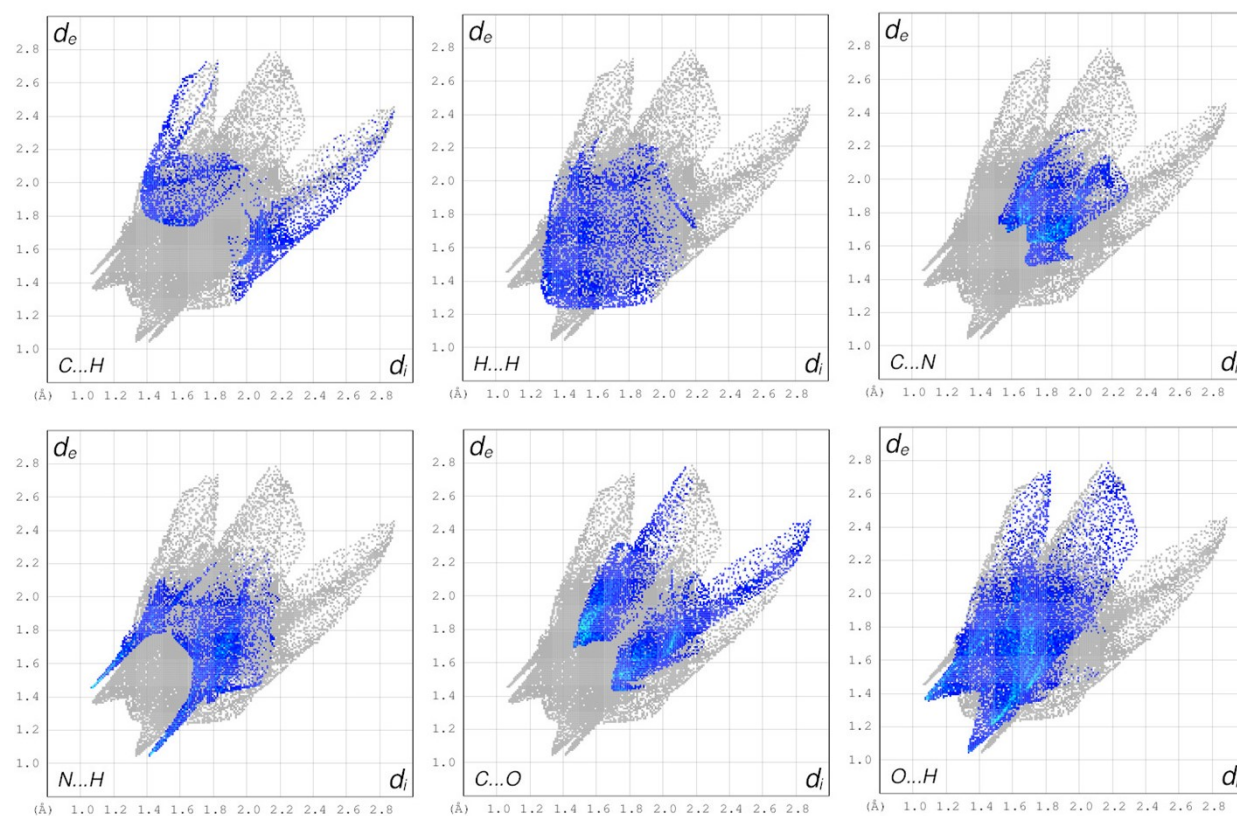

**B**

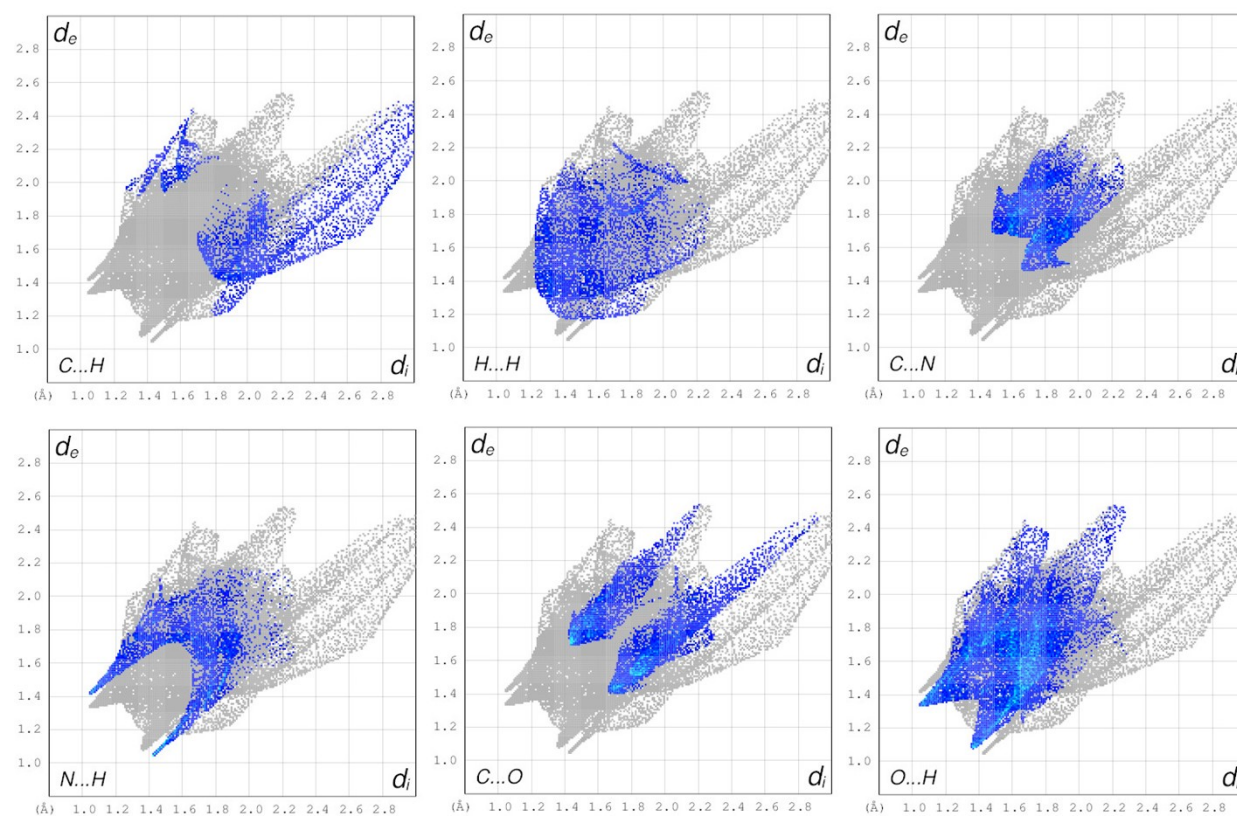

C

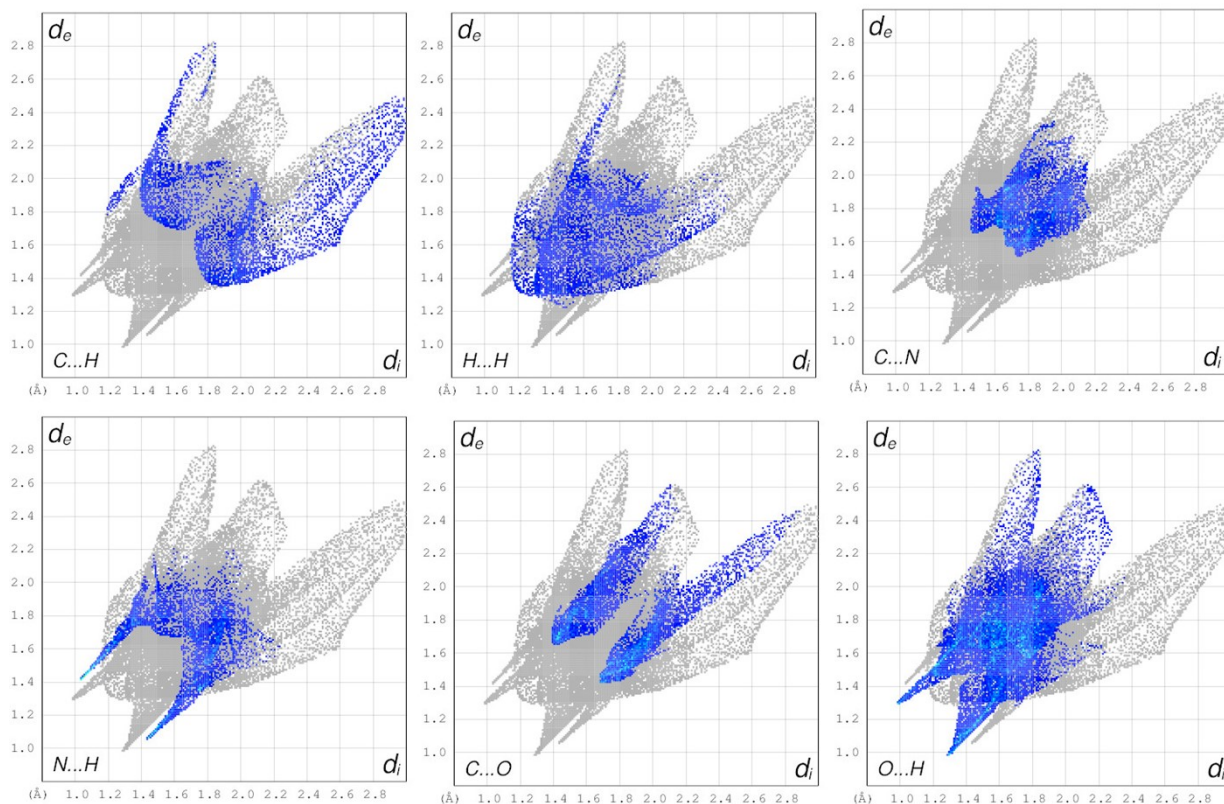

**Fig. S15** 2D fingerprint plots of Hirshfeld surface of main close contacts for compound **8**.

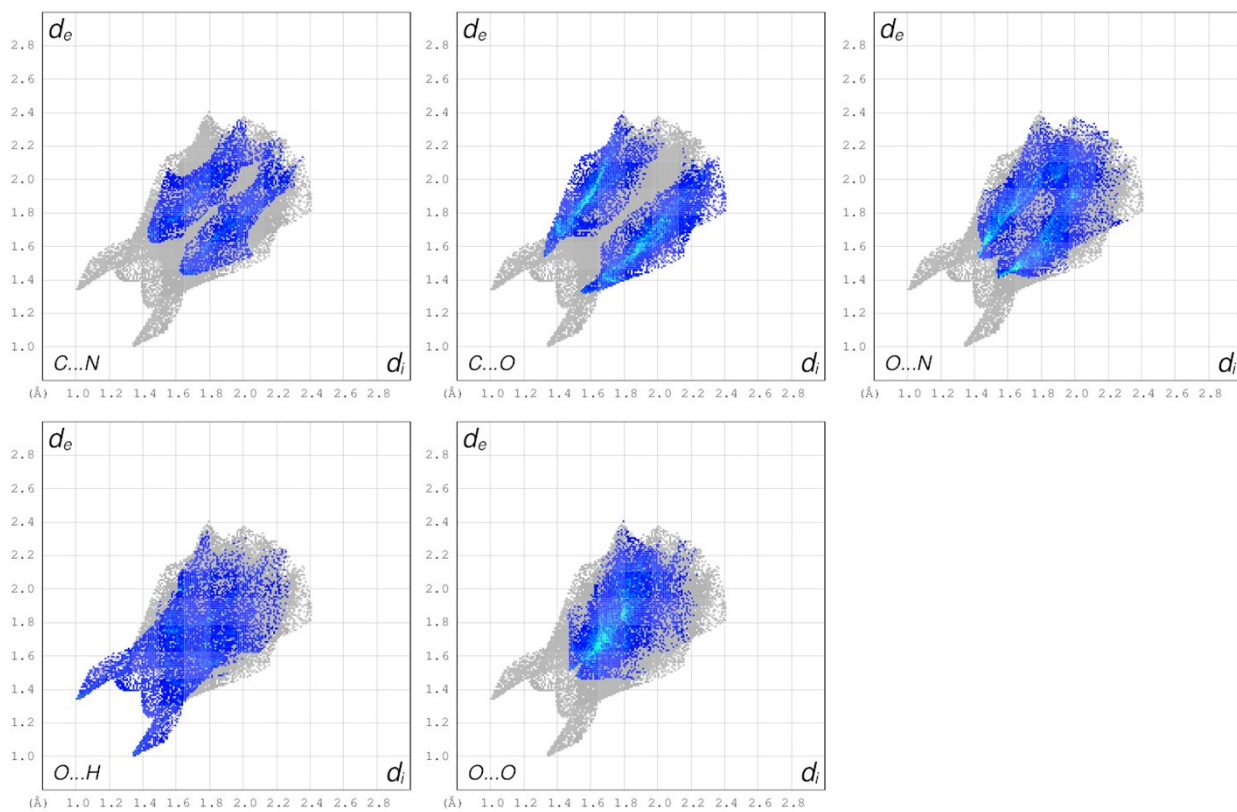

## Experimental section

X-ray diffraction data were collected at 100K on a four-circle Rigaku Synergy S diffractometer equipped with a HyPix6000HE area-detector (kappa geometry, shutterless  $\omega$ -scan technique), using graphite monochromatized Cu  $K_{\alpha}$ -radiation. The intensity data were integrated and corrected for absorption and decay by the CrysAlisPro program<sup>1</sup>. The structure was solved by direct methods using SHELXT<sup>2</sup> and refined on  $F^2$  using SHELXL-2018<sup>3</sup> in the OLEX2 program<sup>4</sup>. All non-hydrogen atoms were refined with individual anisotropic displacement parameters. All hydrogen atoms were placed in ideal calculated positions and refined as riding atoms with relative isotropic displacement parameters. The Mercury program suite<sup>5</sup> was used for molecular graphics. Detailed crystallographic information is given in Table S9.

<sup>1</sup>H, <sup>14</sup>N and <sup>13</sup>C spectra were recorded on a Bruker AM300 spectrometer, operating at 300.13, 21.69 MHz, and 75.47 MHz, respectively. Chemical shifts are reported in delta ( $\delta$ ) units, parts per million (ppm) downfield from external Me<sub>4</sub>Si (<sup>1</sup>H, <sup>13</sup>C) or CH<sub>3</sub>NO<sub>2</sub> (<sup>14</sup>N negative values of  $\delta_N$  correspond to upfield shifts).

[1,2,5]Oxadiazolo[3,4-*c*]cinnoline 1,5-dioxide **7** was prepared by the known method.<sup>6</sup>

### [1,2,5]Oxadiazolo[3,4-*c*]cinnoline 5-oxide (**1**).

**A.** A solutions of HNO<sub>3</sub> (63 mg, 1 mmol) in Ac<sub>2</sub>O (1 mL) and 93% H<sub>2</sub>SO<sub>4</sub> (200 mg, 2 mmol) in Ac<sub>2</sub>O (1 mL) was added successively and quickly to a solution of 3-amino-4-phenylfurazan (**9**) (161 mg, 1 mmol) in Ac<sub>2</sub>O (2 mL) at 0 °C with vigorous stirring. Cooling was removed, the reaction mixture was stirred at 20–25 °C for 30 min and poured into ice water (40 mL). The mixture was stirred for 30 min to complete the hydrolysis of Ac<sub>2</sub>O and extracted with CH<sub>2</sub>Cl<sub>2</sub> (3×5 mL). The combined organic extracts were dried (MgSO<sub>4</sub>) and evaporated *in vacuo*. Cinnoline 5-oxide **1** was isolated by preparative chromatography (silica gel, CHCl<sub>3</sub> as eluent) and obtained in a yield of 96 mg (51 %), m.p. 165 °C (lit. 167–169 °C<sup>7</sup>), and its NMR <sup>1</sup>H, <sup>13</sup>C, <sup>14</sup>N spectra are identical to the earlier synthesized compound **1**<sup>7</sup>.

**B.** A 93% H<sub>2</sub>SO<sub>4</sub> (0.5 g, 5 mmol) was dissolved in (CF<sub>3</sub>CO)<sub>2</sub>O (6 mL) at room temperature for 2.5 h. Then a solution of 3-nitramino-4-phenylfurazan (**11**) (412 mg, 2 mmol) in CH<sub>2</sub>Cl<sub>2</sub> (5 mL) was added to acid mixture at 15–20 °C with vigorous stirring. The reaction mixture was stirred at 20–25 °C for 20 min, the organic layer was separated from the acid by decantation, and poured into ice water (20 ml). The reaction mixture was extracted with CH<sub>2</sub>Cl<sub>2</sub> (3×5 mL), the combined organic extracts were dried (MgSO<sub>4</sub>) and evaporated *in vacuo*. Cinnoline 5-oxide **1** was obtained in a yield of 157 mg (42 %).

### Nitration of [1,2,5]oxadiazolo[3,4-*c*]cinnoline 5-oxide (**1**).

Compound **1** (273 mg, 1.45 mmol) was added at mixing under argon to a solution of  $(\text{NO}_2)_2\text{S}_2\text{O}_7$  (3.54 g, 13 mmol) in  $\text{HNO}_3$  ( $1.5 \text{ g}\cdot\text{cm}^{-3}$ , 8 mL) at 20 °C. The reaction mixture, equipped with a  $\text{CaCl}_2$  tube, was refluxed at 100–105 °C for 100 h and poured into ice water (100 mL). The residue was filtered, washed with  $\text{H}_2\text{O}$  ( $2\times 20$  mL). The mixture of nitrocinnoline 5-oxides **3**, **5** and **8** was separated by preparative chromatography (silica gel,  $\text{CHCl}_3$  as eluent). 7-Nitrocinnoline 5-oxide **3** and 9-nitrocinnoline 5-oxide **5** were isolated in a yields of 50 mg (15 %) and 67 mg (20 %), respectively. The resulting mixture of compounds **5** and **8** was further separated by TLC (silica gel, benzene as eluent), and compound **8** was obtained (2 mg, 1 %).  $^1\text{H}$  NMR,  $\delta$ , ppm: (acetone- $d_6$ ) 9.51 (s, 1H), 9.63 (s, 1H); ( $\text{CD}_3\text{OD}$ ) 9.34 (s, 1H), 9.55 (s, 1H);  $^{14}\text{N}$  NMR,  $\delta$ , ppm ( $\text{CD}_3\text{OD}$ ): -18; -22 ( $2\text{NO}_2$ ), -55 ( $\text{N}\rightarrow\text{O}$ ).

#### Nitration of 9-nitro-[1,2,5]oxadiazolo[3,4-*c*]cinnoline 5-oxide (**5**).

Compound **5** (62 mg, 0.3 mmol) was added at mixing under argon to a solution of  $(\text{NO}_2)_2\text{S}_2\text{O}_7$  (1.06 g, 4 mmol) in  $\text{HNO}_3$  ( $1.5 \text{ g}\cdot\text{cm}^{-3}$ , 1 mL) at 20 °C. The reaction mixture, equipped with a  $\text{CaCl}_2$  tube, was refluxed at 80–85 °C for 120 h and poured into ice water (10 mL). The residue was filtered, washed with  $\text{H}_2\text{O}$  ( $3\times 2$  mL) and dried. The resulting crystals were a mixture of compounds **5** (main) and **8** (traces) according TLC ( $\text{CHCl}_3$ ). The residue was washed with  $\text{CD}_3\text{OD}$  (0.5 mL) with heating to give a solution of a mixture of compounds **5** and **8** with a ratio ~1 : 1 ( $^1\text{H}$  NMR). Evaporation of  $\text{CD}_3\text{OD}$  in *vacuo* gave 0.4 mg of the mixture. The crystals obtained after washing the precipitate with  $\text{CD}_3\text{OD}$  were pure compound **5** (60 mg) according TLC ( $\text{CHCl}_3$ ).

### SXRD experiments

**Table S9** Crystallographic data for structures **1**, **3**, and **5–8**

| Compound              | <b>1</b>                                   | <b>3</b>                                   | <b>5</b>                                   | <b>6</b>                                   | <b>7</b>                                   | <b>8</b>                                   |
|-----------------------|--------------------------------------------|--------------------------------------------|--------------------------------------------|--------------------------------------------|--------------------------------------------|--------------------------------------------|
| CCDC                  | 2288834                                    | 2288835                                    | 2288836                                    | 2288837                                    | 2288838                                    | 2295832                                    |
| Formula               | $\text{C}_8\text{H}_4\text{N}_4\text{O}_2$ | $\text{C}_8\text{H}_3\text{N}_5\text{O}_4$ | $\text{C}_8\text{H}_3\text{N}_5\text{O}_4$ | $\text{C}_8\text{H}_3\text{N}_5\text{O}_5$ | $\text{C}_8\text{H}_4\text{N}_4\text{O}_3$ | $\text{C}_8\text{H}_2\text{N}_6\text{O}_6$ |
| M, $\text{g cm}^{-3}$ | 188.15                                     | 233.15                                     | 233.15                                     | 249.15                                     | 204.15                                     | 278.16                                     |
| T, K                  | 100                                        |                                            |                                            |                                            |                                            |                                            |
| Crystal               | monoclinic                                 | orthorhombic                               | orthorhombic                               | orthorhombic                               | monoclinic                                 | orthorhombic                               |
| Space group           | $P2_1/c$                                   | $Pna2_1$                                   | $Pbca$                                     | $Pna2_1$                                   | $P2_1/c$                                   | $Pca2_1$                                   |
| Z/Z'                  | 4 / 1                                      | 4 / 1                                      | 8 / 1                                      | 4 / 1                                      | 12 / 3                                     | 4 / 1                                      |
| a, Å                  | 7.74397(15)                                | 14.2846(2)                                 | 8.6598(2)                                  | 14.40027(12)                               | 8.09790(10)                                | 12.53304(19)                               |
| b, Å                  | 5.37413(10)                                | 9.99780(10)                                | 12.7026(3)                                 | 10.46252(9)                                | 15.91000(10)                               | 8.30693(13)                                |
| c, Å                  | 18.7390(3)                                 | 6.38630(10)                                | 15.5750(4)                                 | 6.13809(5)                                 | 18.71190(10)                               | 9.61288(13)                                |
| $\beta$ , °           | 99.3886(18)                                | 90                                         | 90                                         | 90                                         | 95.2870(10)                                | 90                                         |

|                                                                          |              |              |              |              |              |              |
|--------------------------------------------------------------------------|--------------|--------------|--------------|--------------|--------------|--------------|
| $V, \text{\AA}^3$                                                        | 769.42(2)    | 912.06(2)    | 1713.28(7)   | 924.783(13)  | 2400.54(4)   | 1000.81(3)   |
| $d_{\text{calc}}, \text{g cm}^{-3}$                                      | 1.624        | 1.698        | 1.808        | 1.790        | 1.695        | 1.846        |
| $\mu, \text{cm}^{-1}$                                                    | 10.51        | 12.29        | 13.08        | 13.44        | 11.63        | 14.32        |
| $2\theta_{\text{max}}, ^\circ$                                           | 155.2        | 155.6        | 155.3        | 155.4        | 155.7        | 159.6        |
| Collected reflns.                                                        | 8675         | 6846         | 10416        | 11803        | 32530        | 12518        |
| Independent reflns.                                                      | 1627         | 1472         | 1824         | 1716         | 5114         | 1908         |
| Reflns with. $I > 2s(I)$                                                 | 1531         | 1441         | 1680         | 1703         | 4842         | 1884         |
| $R_1$                                                                    | 0.0382       | 0.0238       | 0.0439       | 0.0308       | 0.0357       | 0.0322       |
| $wR_2$                                                                   | 0.1047       | 0.0625       | 0.1247       | 0.0831       | 0.0983       | 0.0882       |
| $GOF$                                                                    | 1.041        | 1.075        | 1.059        | 1.077        | 1.034        | 1.058        |
| Residual density,<br>$e \text{\AA}^{-3} (d_{\text{max}}/d_{\text{min}})$ | 0.212/-0.333 | 0.129/-0.154 | 0.485/-0.318 | 0.194/-0.203 | 0.266/-0.303 | 0.262/-0.202 |

### X-ray experiment details for compound 1

**Table S10** Atomic coordinates ( $\times 10^4$ ) and equivalent isotropic displacement parameters ( $\text{\AA}^2 \times 10^3$ ) for CCDC 2288834.  $U(\text{eq})$  is defined as one third of the trace of the orthogonalized  $U^{\text{ij}}$  tensor.

|       | x       | y       | z       | $U(\text{eq})$ |
|-------|---------|---------|---------|----------------|
| O(2)  | 2618(1) | 4976(2) | 4341(1) | 34(1)          |
| O(6)  | 7275(1) | 6906(2) | 2472(1) | 31(1)          |
| N(6)  | 6524(1) | 5995(2) | 2952(1) | 24(1)          |
| N(5)  | 5069(1) | 7003(2) | 3067(1) | 27(1)          |
| N(1)  | 3930(1) | 3183(2) | 4463(1) | 29(1)          |
| N(3)  | 2880(2) | 6634(2) | 3806(1) | 32(1)          |
| C(12) | 6604(2) | 2681(2) | 3882(1) | 22(1)          |
| C(7)  | 7373(2) | 3864(2) | 3346(1) | 22(1)          |
| C(13) | 4977(2) | 3750(2) | 4007(1) | 23(1)          |
| C(11) | 7447(2) | 656(2)  | 4254(1) | 25(1)          |
| C(4)  | 4332(2) | 5864(2) | 3600(1) | 25(1)          |
| C(8)  | 8970(2) | 3059(2) | 3180(1) | 26(1)          |
| C(10) | 9026(2) | -154(2) | 4083(1) | 27(1)          |
| C(9)  | 9782(2) | 1053(3) | 3551(1) | 28(1)          |

**Table S11** Bond lengths [ $\text{\AA}$ ] and angles [ $^\circ$ ] for CCDC 2288834.

|           |            |
|-----------|------------|
| O(2)-N(1) | 1.3918(15) |
|-----------|------------|

|                   |            |
|-------------------|------------|
| O(2)-N(3)         | 1.3815(15) |
| O(6)-N(6)         | 1.2483(13) |
| N(6)-N(5)         | 1.2995(15) |
| N(6)-C(7)         | 1.4603(15) |
| N(5)-C(4)         | 1.3721(17) |
| N(1)-C(13)        | 1.3056(16) |
| N(3)-C(4)         | 1.3140(17) |
| C(12)-C(7)        | 1.4014(16) |
| C(12)-C(13)       | 1.4382(17) |
| C(12)-C(11)       | 1.3954(17) |
| C(7)-C(8)         | 1.3922(17) |
| C(13)-C(4)        | 1.4141(17) |
| C(11)-H(11)       | 0.9500     |
| C(11)-C(10)       | 1.3831(18) |
| C(8)-H(8)         | 0.9500     |
| C(8)-C(9)         | 1.3778(18) |
| C(10)-H(10)       | 0.9500     |
| C(10)-C(9)        | 1.3967(18) |
| C(9)-H(9)         | 0.9500     |
| N(3)-O(2)-N(1)    | 112.05(9)  |
| O(6)-N(6)-N(5)    | 118.34(10) |
| O(6)-N(6)-C(7)    | 116.64(10) |
| N(5)-N(6)-C(7)    | 125.02(10) |
| N(6)-N(5)-C(4)    | 114.20(10) |
| C(13)-N(1)-O(2)   | 104.26(10) |
| C(4)-N(3)-O(2)    | 104.17(10) |
| C(7)-C(12)-C(13)  | 114.93(11) |
| C(11)-C(12)-C(7)  | 119.49(11) |
| C(11)-C(12)-C(13) | 125.57(11) |
| C(12)-C(7)-N(6)   | 120.65(11) |
| C(8)-C(7)-N(6)    | 118.25(11) |
| C(8)-C(7)-C(12)   | 121.10(11) |
| N(1)-C(13)-C(12)  | 131.84(12) |
| N(1)-C(13)-C(4)   | 109.77(11) |
| C(4)-C(13)-C(12)  | 118.35(11) |
| C(12)-C(11)-H(11) | 120.3      |
| C(10)-C(11)-C(12) | 119.31(12) |
| C(10)-C(11)-H(11) | 120.3      |
| N(5)-C(4)-C(13)   | 126.81(11) |
| N(3)-C(4)-N(5)    | 123.44(12) |

|                   |            |
|-------------------|------------|
| N(3)-C(4)-C(13)   | 109.75(11) |
| C(7)-C(8)-H(8)    | 120.7      |
| C(9)-C(8)-C(7)    | 118.63(11) |
| C(9)-C(8)-H(8)    | 120.7      |
| C(11)-C(10)-H(10) | 119.7      |
| C(11)-C(10)-C(9)  | 120.55(12) |
| C(9)-C(10)-H(10)  | 119.7      |
| C(8)-C(9)-C(10)   | 120.92(11) |
| C(8)-C(9)-H(9)    | 119.5      |
| C(10)-C(9)-H(9)   | 119.5      |

**Table S12** Anisotropic displacement parameters ( $\text{\AA}^2 \times 10^3$ ) for CCDC 2288834. The anisotropic displacement factor exponent takes the form:  $-2\pi^2[h^2 a^2 U^{11} + \dots + 2 h k a^* b^* U^{12}]$ .

|       | $U^{11}$ | $U^{22}$ | $U^{33}$ | $U^{23}$ | $U^{13}$ | $U^{12}$ |
|-------|----------|----------|----------|----------|----------|----------|
| O(2)  | 26(1)    | 42(1)    | 34(1)    | -5(1)    | 10(1)    | 5(1)     |
| O(6)  | 36(1)    | 31(1)    | 26(1)    | 7(1)     | 7(1)     | -4(1)    |
| N(6)  | 26(1)    | 24(1)    | 22(1)    | 1(1)     | 3(1)     | -2(1)    |
| N(5)  | 28(1)    | 24(1)    | 27(1)    | 0(1)     | 1(1)     | 3(1)     |
| N(1)  | 25(1)    | 37(1)    | 28(1)    | -3(1)    | 8(1)     | 2(1)     |
| N(3)  | 27(1)    | 34(1)    | 35(1)    | -5(1)    | 4(1)     | 6(1)     |
| C(12) | 23(1)    | 25(1)    | 18(1)    | -3(1)    | 3(1)     | 0(1)     |
| C(7)  | 24(1)    | 22(1)    | 20(1)    | -2(1)    | 2(1)     | 0(1)     |
| C(13) | 24(1)    | 26(1)    | 20(1)    | -3(1)    | 4(1)     | -1(1)    |
| C(11) | 30(1)    | 26(1)    | 20(1)    | 0(1)     | 4(1)     | 1(1)     |
| C(4)  | 24(1)    | 26(1)    | 25(1)    | -5(1)    | 1(1)     | 2(1)     |
| C(8)  | 26(1)    | 32(1)    | 22(1)    | -1(1)    | 6(1)     | 0(1)     |
| C(10) | 31(1)    | 26(1)    | 22(1)    | -2(1)    | -1(1)    | 7(1)     |
| C(9)  | 25(1)    | 35(1)    | 24(1)    | -5(1)    | 4(1)     | 6(1)     |

**Table S13** Hydrogen coordinates ( $\times 10^4$ ) and isotropic displacement parameters ( $\text{\AA}^2 \times 10^3$ ) for CCDC 2288834.

|       | x    | y    | z    | U(eq) |
|-------|------|------|------|-------|
| H(11) | 6943 | -159 | 4620 | 30    |
| H(8)  | 9488 | 3876 | 2818 | 32    |

|       |       |       |      |    |
|-------|-------|-------|------|----|
| H(10) | 9600  | -1543 | 4330 | 33 |
| H(9)  | 10872 | 484   | 3443 | 34 |

---

**Table S14** Torsion angles [°] for CCDC 2288834.

---

|                         |             |
|-------------------------|-------------|
| O(2)-N(1)-C(13)-C(12)   | 177.34(12)  |
| O(2)-N(1)-C(13)-C(4)    | -0.39(13)   |
| O(2)-N(3)-C(4)-N(5)     | 179.80(10)  |
| O(2)-N(3)-C(4)-C(13)    | -0.40(13)   |
| O(6)-N(6)-N(5)-C(4)     | 179.45(10)  |
| O(6)-N(6)-C(7)-C(12)    | -178.41(10) |
| O(6)-N(6)-C(7)-C(8)     | 2.14(16)    |
| N(6)-N(5)-C(4)-N(3)     | 178.63(11)  |
| N(6)-N(5)-C(4)-C(13)    | -1.13(18)   |
| N(6)-C(7)-C(8)-C(9)     | 179.84(10)  |
| N(5)-N(6)-C(7)-C(12)    | 2.07(18)    |
| N(5)-N(6)-C(7)-C(8)     | -177.38(11) |
| N(1)-O(2)-N(3)-C(4)     | 0.17(13)    |
| N(1)-C(13)-C(4)-N(5)    | -179.68(11) |
| N(1)-C(13)-C(4)-N(3)    | 0.53(15)    |
| N(3)-O(2)-N(1)-C(13)    | 0.15(13)    |
| C(12)-C(7)-C(8)-C(9)    | 0.39(18)    |
| C(12)-C(13)-C(4)-N(5)   | 2.24(19)    |
| C(12)-C(13)-C(4)-N(3)   | -177.55(10) |
| C(12)-C(11)-C(10)-C(9)  | 0.69(19)    |
| C(7)-N(6)-N(5)-C(4)     | -1.04(17)   |
| C(7)-C(12)-C(13)-N(1)   | -178.63(12) |
| C(7)-C(12)-C(13)-C(4)   | -1.06(16)   |
| C(7)-C(12)-C(11)-C(10)  | -0.29(18)   |
| C(7)-C(8)-C(9)-C(10)    | 0.01(18)    |
| C(13)-C(12)-C(7)-N(6)   | -0.83(16)   |
| C(13)-C(12)-C(7)-C(8)   | 178.60(10)  |
| C(13)-C(12)-C(11)-C(10) | -179.01(11) |
| C(11)-C(12)-C(7)-N(6)   | -179.68(10) |
| C(11)-C(12)-C(7)-C(8)   | -0.25(18)   |
| C(11)-C(12)-C(13)-N(1)  | 0.1(2)      |
| C(11)-C(12)-C(13)-C(4)  | 177.72(11)  |
| C(11)-C(10)-C(9)-C(8)   | -0.56(19)   |

---



## X-ray experiment details for compound 7

**Table S15** Atomic coordinates ( $\times 10^4$ ) and equivalent isotropic displacement parameters ( $\text{\AA}^2 \times 10^3$ ) for CCDC 2288838.  $U(\text{eq})$  is defined as one third of the trace of the orthogonalized  $U^{\text{ij}}$  tensor.

|       | x       | y       | z       | U(eq) |
|-------|---------|---------|---------|-------|
| O(1A) | 7601(1) | 4020(1) | 2701(1) | 30(1) |
| O(1B) | 7869(1) | 696(1)  | 2317(1) | 24(1) |
| O(1C) | 2584(1) | 2378(1) | 2650(1) | 26(1) |
| O(2A) | 2107(1) | 4634(1) | 4188(1) | 27(1) |
| O(2B) | 2551(1) | 1012(1) | 3966(1) | 26(1) |
| O(2C) | 7702(1) | 2987(1) | 944(1)  | 26(1) |
| O(3A) | 2999(1) | 5858(1) | 4771(1) | 29(1) |
| O(3B) | 3518(1) | 2127(1) | 4682(1) | 27(1) |
| O(3C) | 6556(1) | 4114(1) | 291(1)  | 29(1) |
| N(1A) | 6635(1) | 4337(1) | 3107(1) | 22(1) |
| N(1B) | 6956(1) | 928(1)  | 2782(1) | 20(1) |
| N(1C) | 3443(1) | 2687(1) | 2195(1) | 20(1) |
| N(2A) | 5228(1) | 3960(1) | 3173(1) | 24(1) |
| N(2B) | 5534(1) | 554(1)  | 2807(1) | 21(1) |
| N(2C) | 4880(1) | 2351(1) | 2120(1) | 21(1) |
| N(3A) | 2743(1) | 4070(1) | 3727(1) | 27(1) |
| N(3B) | 3122(1) | 541(1)  | 3419(1) | 25(1) |
| N(3C) | 7234(1) | 2464(1) | 1477(1) | 25(1) |
| N(4A) | 3337(1) | 5295(1) | 4354(1) | 23(1) |
| N(4B) | 3802(1) | 1643(1) | 4192(1) | 21(1) |
| N(4C) | 6367(1) | 3594(1) | 765(1)  | 22(1) |
| C(1A) | 7186(1) | 5111(1) | 3482(1) | 21(1) |
| C(1B) | 7584(1) | 1604(1) | 3263(1) | 19(1) |
| C(1C) | 2727(1) | 3397(1) | 1780(1) | 20(1) |
| C(2A) | 8730(2) | 5434(1) | 3364(1) | 24(1) |
| C(2B) | 9164(1) | 1913(1) | 3194(1) | 22(1) |
| C(2C) | 1165(1) | 3681(1) | 1917(1) | 24(1) |
| C(3A) | 9260(2) | 6165(1) | 3717(1) | 26(1) |
| C(3B) | 9751(1) | 2559(1) | 3647(1) | 23(1) |
| C(3C) | 461(2)  | 4336(1) | 1507(1) | 26(1) |
| C(4A) | 8266(2) | 6567(1) | 4185(1) | 24(1) |
| C(4B) | 8777(1) | 2896(1) | 4154(1) | 23(1) |
| C(4C) | 1295(2) | 4698(1) | 963(1)  | 26(1) |

|       |         |         |         |       |
|-------|---------|---------|---------|-------|
| C(5A) | 6723(1) | 6246(1) | 4300(1) | 22(1) |
| C(5B) | 7205(1) | 2584(1) | 4224(1) | 21(1) |
| C(5C) | 2861(2) | 4421(1) | 831(1)  | 24(1) |
| C(6A) | 6168(1) | 5514(1) | 3943(1) | 20(1) |
| C(6B) | 6604(1) | 1929(1) | 3777(1) | 19(1) |
| C(6C) | 3594(1) | 3770(1) | 1246(1) | 20(1) |
| C(7A) | 4608(1) | 5107(1) | 3996(1) | 21(1) |
| C(7B) | 5030(1) | 1525(1) | 3789(1) | 20(1) |
| C(7C) | 5199(1) | 3414(1) | 1186(1) | 20(1) |
| C(8A) | 4220(1) | 4360(1) | 3617(1) | 22(1) |
| C(8B) | 4585(1) | 858(1)  | 3320(1) | 21(1) |
| C(8C) | 5758(1) | 2730(1) | 1616(1) | 20(1) |

---

**Table S16** Bond lengths [Å] and angles [°] for CCDC 2288838.

---

|             |            |
|-------------|------------|
| O(1A)-N(1A) | 1.2465(13) |
| O(1B)-N(1B) | 1.2485(13) |
| O(1C)-N(1C) | 1.2483(13) |
| O(2A)-N(3A) | 1.3765(14) |
| O(2A)-N(4A) | 1.4630(12) |
| O(2B)-N(3B) | 1.3817(13) |
| O(2B)-N(4B) | 1.4602(12) |
| O(2C)-N(3C) | 1.3794(13) |
| O(2C)-N(4C) | 1.4652(13) |
| O(3A)-N(4A) | 1.2349(14) |
| O(3B)-N(4B) | 1.2352(13) |
| O(3C)-N(4C) | 1.2323(13) |
| N(1A)-N(2A) | 1.3035(14) |
| N(1A)-C(1A) | 1.4663(14) |
| N(1B)-N(2B) | 1.3005(13) |
| N(1B)-C(1B) | 1.4626(14) |
| N(1C)-N(2C) | 1.3000(14) |
| N(1C)-C(1C) | 1.4601(14) |
| N(2A)-C(8A) | 1.3730(16) |
| N(2B)-C(8B) | 1.3719(15) |
| N(2C)-C(8C) | 1.3726(15) |
| N(3A)-C(8A) | 1.3158(16) |
| N(3B)-C(8B) | 1.3159(15) |
| N(3C)-C(8C) | 1.3162(15) |

|             |            |
|-------------|------------|
| N(4A)-C(7A) | 1.3140(15) |
| N(4B)-C(7B) | 1.3157(15) |
| N(4C)-C(7C) | 1.3170(15) |
| C(1A)-C(2A) | 1.3881(16) |
| C(1A)-C(6A) | 1.4015(16) |
| C(1B)-C(2B) | 1.3879(15) |
| C(1B)-C(6B) | 1.4016(16) |
| C(1C)-C(2C) | 1.3887(16) |
| C(1C)-C(6C) | 1.4041(16) |
| C(2A)-H(2A) | 0.9500     |
| C(2A)-C(3A) | 1.3863(17) |
| C(2B)-H(2B) | 0.9500     |
| C(2B)-C(3B) | 1.3880(16) |
| C(2C)-H(2C) | 0.9500     |
| C(2C)-C(3C) | 1.3856(17) |
| C(3A)-H(3A) | 0.9500     |
| C(3A)-C(4A) | 1.3978(18) |
| C(3B)-H(3B) | 0.9500     |
| C(3B)-C(4B) | 1.3955(17) |
| C(3C)-H(3C) | 0.9500     |
| C(3C)-C(4C) | 1.3965(19) |
| C(4A)-H(4A) | 0.9500     |
| C(4A)-C(5A) | 1.3846(16) |
| C(4B)-H(4B) | 0.9500     |
| C(4B)-C(5B) | 1.3837(16) |
| C(4C)-H(4C) | 0.9500     |
| C(4C)-C(5C) | 1.3864(17) |
| C(5A)-H(5A) | 0.9500     |
| C(5A)-C(6A) | 1.3971(16) |
| C(5B)-H(5B) | 0.9500     |
| C(5B)-C(6B) | 1.3957(15) |
| C(5C)-H(5C) | 0.9500     |
| C(5C)-C(6C) | 1.3947(16) |
| C(6A)-C(7A) | 1.4310(15) |
| C(6B)-C(7B) | 1.4287(15) |
| C(6C)-C(7C) | 1.4309(15) |
| C(7A)-C(8A) | 1.4051(16) |
| C(7B)-C(8B) | 1.4047(16) |
| C(7C)-C(8C) | 1.4042(16) |

|                   |            |
|-------------------|------------|
| N(3A)-O(2A)-N(4A) | 108.39(8)  |
| N(3B)-O(2B)-N(4B) | 108.47(8)  |
| N(3C)-O(2C)-N(4C) | 108.46(8)  |
| O(1A)-N(1A)-N(2A) | 118.35(10) |
| O(1A)-N(1A)-C(1A) | 116.82(10) |
| N(2A)-N(1A)-C(1A) | 124.83(10) |
| O(1B)-N(1B)-N(2B) | 118.15(9)  |
| O(1B)-N(1B)-C(1B) | 116.85(9)  |
| N(2B)-N(1B)-C(1B) | 125.00(9)  |
| O(1C)-N(1C)-N(2C) | 118.13(9)  |
| O(1C)-N(1C)-C(1C) | 116.62(9)  |
| N(2C)-N(1C)-C(1C) | 125.25(9)  |
| N(1A)-N(2A)-C(8A) | 114.68(10) |
| N(1B)-N(2B)-C(8B) | 114.73(9)  |
| N(1C)-N(2C)-C(8C) | 114.73(9)  |
| C(8A)-N(3A)-O(2A) | 105.53(9)  |
| C(8B)-N(3B)-O(2B) | 105.33(9)  |
| C(8C)-N(3C)-O(2C) | 105.31(9)  |
| O(3A)-N(4A)-O(2A) | 118.07(9)  |
| O(3A)-N(4A)-C(7A) | 135.82(10) |
| C(7A)-N(4A)-O(2A) | 106.10(9)  |
| O(3B)-N(4B)-O(2B) | 118.18(9)  |
| O(3B)-N(4B)-C(7B) | 135.72(10) |
| C(7B)-N(4B)-O(2B) | 106.10(9)  |
| O(3C)-N(4C)-O(2C) | 117.91(9)  |
| O(3C)-N(4C)-C(7C) | 136.06(11) |
| C(7C)-N(4C)-O(2C) | 106.03(9)  |
| C(2A)-C(1A)-N(1A) | 118.24(10) |
| C(2A)-C(1A)-C(6A) | 121.21(11) |
| C(6A)-C(1A)-N(1A) | 120.55(10) |
| C(2B)-C(1B)-N(1B) | 118.39(10) |
| C(2B)-C(1B)-C(6B) | 121.18(10) |
| C(6B)-C(1B)-N(1B) | 120.43(10) |
| C(2C)-C(1C)-N(1C) | 118.49(10) |
| C(2C)-C(1C)-C(6C) | 121.18(10) |
| C(6C)-C(1C)-N(1C) | 120.31(10) |
| C(1A)-C(2A)-H(2A) | 120.7      |
| C(3A)-C(2A)-C(1A) | 118.55(11) |
| C(3A)-C(2A)-H(2A) | 120.7      |
| C(1B)-C(2B)-H(2B) | 120.9      |

|                   |            |
|-------------------|------------|
| C(1B)-C(2B)-C(3B) | 118.25(11) |
| C(3B)-C(2B)-H(2B) | 120.9      |
| C(1C)-C(2C)-H(2C) | 120.7      |
| C(3C)-C(2C)-C(1C) | 118.55(11) |
| C(3C)-C(2C)-H(2C) | 120.7      |
| C(2A)-C(3A)-H(3A) | 119.6      |
| C(2A)-C(3A)-C(4A) | 120.81(11) |
| C(4A)-C(3A)-H(3A) | 119.6      |
| C(2B)-C(3B)-H(3B) | 119.5      |
| C(2B)-C(3B)-C(4B) | 121.07(11) |
| C(4B)-C(3B)-H(3B) | 119.5      |
| C(2C)-C(3C)-H(3C) | 119.6      |
| C(2C)-C(3C)-C(4C) | 120.77(11) |
| C(4C)-C(3C)-H(3C) | 119.6      |
| C(3A)-C(4A)-H(4A) | 119.7      |
| C(5A)-C(4A)-C(3A) | 120.57(11) |
| C(5A)-C(4A)-H(4A) | 119.7      |
| C(3B)-C(4B)-H(4B) | 119.7      |
| C(5B)-C(4B)-C(3B) | 120.59(11) |
| C(5B)-C(4B)-H(4B) | 119.7      |
| C(3C)-C(4C)-H(4C) | 119.6      |
| C(5C)-C(4C)-C(3C) | 120.73(11) |
| C(5C)-C(4C)-H(4C) | 119.6      |
| C(4A)-C(5A)-H(5A) | 120.4      |
| C(4A)-C(5A)-C(6A) | 119.19(11) |
| C(6A)-C(5A)-H(5A) | 120.4      |
| C(4B)-C(5B)-H(5B) | 120.5      |
| C(4B)-C(5B)-C(6B) | 119.00(11) |
| C(6B)-C(5B)-H(5B) | 120.5      |
| C(4C)-C(5C)-H(5C) | 120.5      |
| C(4C)-C(5C)-C(6C) | 119.08(11) |
| C(6C)-C(5C)-H(5C) | 120.5      |
| C(1A)-C(6A)-C(7A) | 114.12(10) |
| C(5A)-C(6A)-C(1A) | 119.65(10) |
| C(5A)-C(6A)-C(7A) | 126.23(11) |
| C(1B)-C(6B)-C(7B) | 114.06(10) |
| C(5B)-C(6B)-C(1B) | 119.90(10) |
| C(5B)-C(6B)-C(7B) | 126.03(11) |
| C(1C)-C(6C)-C(7C) | 113.97(10) |
| C(5C)-C(6C)-C(1C) | 119.67(11) |

|                   |            |
|-------------------|------------|
| C(5C)-C(6C)-C(7C) | 126.36(11) |
| N(4A)-C(7A)-C(6A) | 132.11(11) |
| N(4A)-C(7A)-C(8A) | 107.53(10) |
| C(8A)-C(7A)-C(6A) | 120.36(11) |
| N(4B)-C(7B)-C(6B) | 131.92(11) |
| N(4B)-C(7B)-C(8B) | 107.55(10) |
| C(8B)-C(7B)-C(6B) | 120.51(10) |
| N(4C)-C(7C)-C(6C) | 131.96(11) |
| N(4C)-C(7C)-C(8C) | 107.43(10) |
| C(8C)-C(7C)-C(6C) | 120.59(10) |
| N(2A)-C(8A)-C(7A) | 125.43(11) |
| N(3A)-C(8A)-N(2A) | 122.13(11) |
| N(3A)-C(8A)-C(7A) | 112.44(11) |
| N(2B)-C(8B)-C(7B) | 125.18(10) |
| N(3B)-C(8B)-N(2B) | 122.28(10) |
| N(3B)-C(8B)-C(7B) | 112.55(11) |
| N(2C)-C(8C)-C(7C) | 125.07(10) |
| N(3C)-C(8C)-N(2C) | 122.15(10) |
| N(3C)-C(8C)-C(7C) | 112.77(10) |

**Table S17** Anisotropic displacement parameters ( $\text{\AA}^2 \times 10^3$ ) for CCDC 2288838. The anisotropic displacement factor exponent takes the form:  $-2\pi^2[h^2 a^{*2}U^{11} + \dots + 2 h k a^* b^* U^{12}]$

|       | U <sup>11</sup> | U <sup>22</sup> | U <sup>33</sup> | U <sup>23</sup> | U <sup>13</sup> | U <sup>12</sup> |
|-------|-----------------|-----------------|-----------------|-----------------|-----------------|-----------------|
| O(1A) | 33(1)           | 26(1)           | 30(1)           | -4(1)           | 4(1)            | 5(1)            |
| O(1B) | 26(1)           | 24(1)           | 24(1)           | -4(1)           | 4(1)            | 1(1)            |
| O(1C) | 27(1)           | 26(1)           | 25(1)           | 5(1)            | 4(1)            | -2(1)           |
| O(2A) | 23(1)           | 27(1)           | 31(1)           | 2(1)            | 0(1)            | -6(1)           |
| O(2B) | 20(1)           | 28(1)           | 28(1)           | -1(1)           | 2(1)            | -7(1)           |
| O(2C) | 22(1)           | 30(1)           | 27(1)           | 0(1)            | 3(1)            | 3(1)            |
| O(3A) | 31(1)           | 29(1)           | 27(1)           | -4(1)           | 4(1)            | 1(1)            |
| O(3B) | 27(1)           | 30(1)           | 23(1)           | -3(1)           | 4(1)            | -1(1)           |
| O(3C) | 36(1)           | 29(1)           | 24(1)           | 5(1)            | 5(1)            | -3(1)           |
| N(1A) | 25(1)           | 19(1)           | 22(1)           | 0(1)            | -2(1)           | 2(1)            |
| N(1B) | 21(1)           | 18(1)           | 20(1)           | 1(1)            | -2(1)           | 1(1)            |
| N(1C) | 21(1)           | 18(1)           | 19(1)           | -1(1)           | -1(1)           | -1(1)           |
| N(2A) | 26(1)           | 19(1)           | 27(1)           | 0(1)            | -4(1)           | -2(1)           |
| N(2B) | 21(1)           | 18(1)           | 23(1)           | 0(1)            | -2(1)           | -2(1)           |

|       |       |       |       |       |       |       |
|-------|-------|-------|-------|-------|-------|-------|
| N(2C) | 22(1) | 19(1) | 22(1) | 0(1)  | -2(1) | 3(1)  |
| N(3A) | 27(1) | 22(1) | 30(1) | 2(1)  | -3(1) | -4(1) |
| N(3B) | 24(1) | 24(1) | 26(1) | -1(1) | -1(1) | -5(1) |
| N(3C) | 24(1) | 25(1) | 24(1) | 0(1)  | 1(1)  | 4(1)  |
| N(4A) | 22(1) | 23(1) | 24(1) | 3(1)  | -2(1) | -4(1) |
| N(4B) | 20(1) | 22(1) | 22(1) | 1(1)  | -1(1) | -3(1) |
| N(4C) | 23(1) | 22(1) | 21(1) | -1(1) | 0(1)  | 0(1)  |
| C(1A) | 22(1) | 19(1) | 21(1) | 2(1)  | -4(1) | -1(1) |
| C(1B) | 20(1) | 16(1) | 20(1) | 1(1)  | -3(1) | -1(1) |
| C(1C) | 21(1) | 18(1) | 20(1) | -2(1) | -3(1) | 1(1)  |
| C(2A) | 22(1) | 26(1) | 23(1) | 3(1)  | 0(1)  | 0(1)  |
| C(2B) | 20(1) | 22(1) | 23(1) | 2(1)  | 1(1)  | 0(1)  |
| C(2C) | 21(1) | 25(1) | 25(1) | -3(1) | 0(1)  | 1(1)  |
| C(3A) | 21(1) | 28(1) | 27(1) | 5(1)  | -3(1) | -6(1) |
| C(3B) | 19(1) | 24(1) | 26(1) | 2(1)  | -1(1) | -5(1) |
| C(3C) | 23(1) | 26(1) | 30(1) | -6(1) | -4(1) | 7(1)  |
| C(4A) | 27(1) | 22(1) | 22(1) | 2(1)  | -6(1) | -5(1) |
| C(4B) | 25(1) | 22(1) | 22(1) | 0(1)  | -4(1) | -5(1) |
| C(4C) | 31(1) | 21(1) | 25(1) | -3(1) | -9(1) | 6(1)  |
| C(5A) | 25(1) | 21(1) | 19(1) | 1(1)  | -3(1) | -1(1) |
| C(5B) | 24(1) | 21(1) | 18(1) | 0(1)  | 0(1)  | -1(1) |
| C(5C) | 30(1) | 20(1) | 20(1) | -1(1) | -3(1) | 1(1)  |
| C(6A) | 20(1) | 19(1) | 19(1) | 3(1)  | -3(1) | -1(1) |
| C(6B) | 19(1) | 19(1) | 18(1) | 3(1)  | -2(1) | -1(1) |
| C(6C) | 22(1) | 18(1) | 18(1) | -2(1) | -3(1) | 1(1)  |
| C(7A) | 21(1) | 19(1) | 21(1) | 3(1)  | -3(1) | -1(1) |
| C(7B) | 19(1) | 20(1) | 19(1) | 2(1)  | -1(1) | -1(1) |
| C(7C) | 21(1) | 20(1) | 18(1) | -2(1) | -1(1) | -1(1) |
| C(8A) | 23(1) | 18(1) | 23(1) | 3(1)  | -4(1) | -2(1) |
| C(8B) | 20(1) | 19(1) | 22(1) | 2(1)  | -3(1) | -2(1) |
| C(8C) | 21(1) | 19(1) | 19(1) | -3(1) | -2(1) | 1(1)  |

**Table S18** Hydrogen coordinates ( $\times 10^4$ ) and isotropic displacement parameters ( $\text{\AA}^2 \times 10^3$ ) for CCDC 2288838

|       | x    | y    | z    | U(eq) |
|-------|------|------|------|-------|
| H(2A) | 9408 | 5159 | 3047 | 29    |

|       |       |      |      |    |
|-------|-------|------|------|----|
| H(2B) | 9826  | 1689 | 2847 | 26 |
| H(2C) | 592   | 3431 | 2283 | 29 |
| H(3A) | 10311 | 6395 | 3640 | 31 |
| H(3B) | 10833 | 2776 | 3611 | 28 |
| H(3C) | -603  | 4541 | 1596 | 32 |
| H(4A) | 8653  | 7064 | 4426 | 29 |
| H(4B) | 9197  | 3343 | 4455 | 28 |
| H(4C) | 785   | 5140 | 682  | 32 |
| H(5A) | 6049  | 6522 | 4618 | 26 |
| H(5B) | 6546  | 2812 | 4571 | 25 |
| H(5C) | 3427  | 4671 | 462  | 28 |

---

**Table S19** Torsion angles [°] for CCDC 2288838

---

|                         |             |
|-------------------------|-------------|
| O(1A)-N(1A)-N(2A)-C(8A) | -178.52(9)  |
| O(1A)-N(1A)-C(1A)-C(2A) | -0.29(15)   |
| O(1A)-N(1A)-C(1A)-C(6A) | 179.29(10)  |
| O(1B)-N(1B)-N(2B)-C(8B) | -178.46(9)  |
| O(1B)-N(1B)-C(1B)-C(2B) | -2.89(14)   |
| O(1B)-N(1B)-C(1B)-C(6B) | 176.95(10)  |
| O(1C)-N(1C)-N(2C)-C(8C) | -179.39(9)  |
| O(1C)-N(1C)-C(1C)-C(2C) | 0.20(15)    |
| O(1C)-N(1C)-C(1C)-C(6C) | -178.53(10) |
| O(2A)-N(3A)-C(8A)-N(2A) | -179.33(10) |
| O(2A)-N(3A)-C(8A)-C(7A) | 0.35(13)    |
| O(2A)-N(4A)-C(7A)-C(6A) | 179.89(11)  |
| O(2A)-N(4A)-C(7A)-C(8A) | -0.09(12)   |
| O(2B)-N(3B)-C(8B)-N(2B) | -179.20(9)  |
| O(2B)-N(3B)-C(8B)-C(7B) | 0.60(13)    |
| O(2B)-N(4B)-C(7B)-C(6B) | -177.80(11) |
| O(2B)-N(4B)-C(7B)-C(8B) | 0.61(12)    |
| O(2C)-N(3C)-C(8C)-N(2C) | 179.37(9)   |
| O(2C)-N(3C)-C(8C)-C(7C) | 0.65(13)    |
| O(2C)-N(4C)-C(7C)-C(6C) | -178.06(11) |
| O(2C)-N(4C)-C(7C)-C(8C) | 0.28(12)    |
| O(3A)-N(4A)-C(7A)-C(6A) | -1.0(2)     |
| O(3A)-N(4A)-C(7A)-C(8A) | 179.06(12)  |
| O(3B)-N(4B)-C(7B)-C(6B) | 1.5(2)      |
| O(3B)-N(4B)-C(7B)-C(8B) | 179.93(12)  |



|                         |             |
|-------------------------|-------------|
| O(3C)-N(4C)-C(7C)-C(6C) | 1.3(2)      |
| O(3C)-N(4C)-C(7C)-C(8C) | 179.67(12)  |
| N(1A)-N(2A)-C(8A)-N(3A) | 178.48(10)  |
| N(1A)-N(2A)-C(8A)-C(7A) | -1.16(17)   |
| N(1A)-C(1A)-C(2A)-C(3A) | -179.87(10) |
| N(1A)-C(1A)-C(6A)-C(5A) | 179.38(10)  |
| N(1A)-C(1A)-C(6A)-C(7A) | -0.54(15)   |
| N(1B)-N(2B)-C(8B)-N(3B) | -179.26(10) |
| N(1B)-N(2B)-C(8B)-C(7B) | 0.97(16)    |
| N(1B)-C(1B)-C(2B)-C(3B) | 179.47(10)  |
| N(1B)-C(1B)-C(6B)-C(5B) | -178.88(10) |
| N(1B)-C(1B)-C(6B)-C(7B) | 1.76(14)    |
| N(1C)-N(2C)-C(8C)-N(3C) | 179.95(10)  |
| N(1C)-N(2C)-C(8C)-C(7C) | -1.49(16)   |
| N(1C)-C(1C)-C(2C)-C(3C) | -177.88(10) |
| N(1C)-C(1C)-C(6C)-C(5C) | 176.97(10)  |
| N(1C)-C(1C)-C(6C)-C(7C) | -2.60(15)   |
| N(2A)-N(1A)-C(1A)-C(2A) | 179.22(10)  |
| N(2A)-N(1A)-C(1A)-C(6A) | -1.19(16)   |
| N(2B)-N(1B)-C(1B)-C(2B) | 176.76(10)  |
| N(2B)-N(1B)-C(1B)-C(6B) | -3.39(16)   |
| N(2C)-N(1C)-C(1C)-C(2C) | 179.24(10)  |
| N(2C)-N(1C)-C(1C)-C(6C) | 0.50(16)    |
| N(3A)-O(2A)-N(4A)-O(3A) | -179.02(9)  |
| N(3A)-O(2A)-N(4A)-C(7A) | 0.31(11)    |
| N(3B)-O(2B)-N(4B)-O(3B) | -179.74(9)  |
| N(3B)-O(2B)-N(4B)-C(7B) | -0.28(11)   |
| N(3C)-O(2C)-N(4C)-O(3C) | -179.42(9)  |
| N(3C)-O(2C)-N(4C)-C(7C) | 0.10(11)    |
| N(4A)-O(2A)-N(3A)-C(8A) | -0.40(11)   |
| N(4A)-C(7A)-C(8A)-N(2A) | 179.51(11)  |
| N(4A)-C(7A)-C(8A)-N(3A) | -0.16(14)   |
| N(4B)-O(2B)-N(3B)-C(8B) | -0.20(12)   |
| N(4B)-C(7B)-C(8B)-N(2B) | 178.99(10)  |
| N(4B)-C(7B)-C(8B)-N(3B) | -0.80(14)   |
| N(4C)-O(2C)-N(3C)-C(8C) | -0.45(11)   |
| N(4C)-C(7C)-C(8C)-N(2C) | -179.29(10) |
| N(4C)-C(7C)-C(8C)-N(3C) | -0.61(13)   |
| C(1A)-N(1A)-N(2A)-C(8A) | 1.97(16)    |
| C(1A)-C(2A)-C(3A)-C(4A) | 0.28(17)    |

|                         |             |
|-------------------------|-------------|
| C(1A)-C(6A)-C(7A)-N(4A) | -178.71(11) |
| C(1A)-C(6A)-C(7A)-C(8A) | 1.27(15)    |
| C(1B)-N(1B)-N(2B)-C(8B) | 1.89(15)    |
| C(1B)-C(2B)-C(3B)-C(4B) | -0.55(17)   |
| C(1B)-C(6B)-C(7B)-N(4B) | 179.04(11)  |
| C(1B)-C(6B)-C(7B)-C(8B) | 0.80(15)    |
| C(1C)-N(1C)-N(2C)-C(8C) | 1.59(15)    |
| C(1C)-C(2C)-C(3C)-C(4C) | 0.61(18)    |
| C(1C)-C(6C)-C(7C)-N(4C) | -179.15(11) |
| C(1C)-C(6C)-C(7C)-C(8C) | 2.70(15)    |
| C(2A)-C(1A)-C(6A)-C(5A) | -1.05(17)   |
| C(2A)-C(1A)-C(6A)-C(7A) | 179.04(10)  |
| C(2A)-C(3A)-C(4A)-C(5A) | -0.60(18)   |
| C(2B)-C(1B)-C(6B)-C(5B) | 0.96(16)    |
| C(2B)-C(1B)-C(6B)-C(7B) | -178.40(10) |
| C(2B)-C(3B)-C(4B)-C(5B) | 0.88(18)    |
| C(2C)-C(1C)-C(6C)-C(5C) | -1.73(16)   |
| C(2C)-C(1C)-C(6C)-C(7C) | 178.70(10)  |
| C(2C)-C(3C)-C(4C)-C(5C) | -1.21(18)   |
| C(3A)-C(4A)-C(5A)-C(6A) | 0.09(17)    |
| C(3B)-C(4B)-C(5B)-C(6B) | -0.28(17)   |
| C(3C)-C(4C)-C(5C)-C(6C) | 0.31(18)    |
| C(4A)-C(5A)-C(6A)-C(1A) | 0.71(16)    |
| C(4A)-C(5A)-C(6A)-C(7A) | -179.39(10) |
| C(4B)-C(5B)-C(6B)-C(1B) | -0.62(16)   |
| C(4B)-C(5B)-C(6B)-C(7B) | 178.66(10)  |
| C(4C)-C(5C)-C(6C)-C(1C) | 1.13(17)    |
| C(4C)-C(5C)-C(6C)-C(7C) | -179.36(11) |
| C(5A)-C(6A)-C(7A)-N(4A) | 1.4(2)      |
| C(5A)-C(6A)-C(7A)-C(8A) | -178.64(11) |
| C(5B)-C(6B)-C(7B)-N(4B) | -0.3(2)     |
| C(5B)-C(6B)-C(7B)-C(8B) | -178.51(11) |
| C(5C)-C(6C)-C(7C)-N(4C) | 1.3(2)      |
| C(5C)-C(6C)-C(7C)-C(8C) | -176.84(11) |
| C(6A)-C(1A)-C(2A)-C(3A) | 0.55(17)    |
| C(6A)-C(7A)-C(8A)-N(2A) | -0.48(17)   |
| C(6A)-C(7A)-C(8A)-N(3A) | 179.85(10)  |
| C(6B)-C(1B)-C(2B)-C(3B) | -0.37(17)   |
| C(6B)-C(7B)-C(8B)-N(2B) | -2.38(17)   |
| C(6B)-C(7B)-C(8B)-N(3B) | 177.83(10)  |

|                         |            |
|-------------------------|------------|
| C(6C)-C(1C)-C(2C)-C(3C) | 0.85(17)   |
| C(6C)-C(7C)-C(8C)-N(2C) | -0.72(17)  |
| C(6C)-C(7C)-C(8C)-N(3C) | 177.95(10) |

---

### X-ray experiment details for compound 6

**Table S20** Atomic coordinates ( $\times 10^4$ ) and equivalent isotropic displacement parameters ( $\text{\AA}^2 \times 10^3$ ) for CCDC 2288837.  $U(\text{eq})$  is defined as one third of the trace of the orthogonalized  $U^{ij}$  tensor

---

|      | x       | y       | z       | U(eq) |
|------|---------|---------|---------|-------|
| O(1) | 1800(1) | 3519(1) | 3693(3) | 22(1) |
| N(1) | 4257(1) | 5504(2) | 8283(3) | 18(1) |
| C(1) | 3810(1) | 5833(2) | 6232(3) | 17(1) |
| O(2) | 1757(1) | 4646(1) | 723(3)  | 22(1) |
| N(2) | 4935(1) | 6144(2) | 9163(3) | 21(1) |
| C(2) | 3115(1) | 5024(2) | 5477(4) | 17(1) |
| N(3) | 5968(1) | 7849(2) | 8552(4) | 26(1) |
| O(3) | 3954(1) | 4542(1) | 9270(3) | 22(1) |
| C(3) | 2719(1) | 5333(2) | 3508(4) | 16(1) |
| O(4) | 6072(1) | 8758(1) | 6952(3) | 27(1) |
| N(4) | 5341(1) | 8572(2) | 5299(3) | 21(1) |
| C(4) | 2947(1) | 6424(2) | 2311(4) | 18(1) |
| N(5) | 2039(1) | 4438(2) | 2572(3) | 17(1) |
| O(5) | 5334(1) | 9282(2) | 3721(3) | 29(1) |
| C(5) | 3642(1) | 7214(2) | 3087(3) | 18(1) |
| C(6) | 4090(1) | 6909(2) | 5040(4) | 17(1) |
| C(7) | 4852(1) | 7582(2) | 5986(4) | 19(1) |
| C(8) | 5244(1) | 7171(2) | 7958(4) | 20(1) |

---

**Table S21** Bond lengths [ $\text{\AA}$ ] and angles [ $^\circ$ ] for CCDC 2288837

---

|           |          |
|-----------|----------|
| O(1)-N(5) | 1.231(2) |
| N(1)-C(1) | 1.455(3) |
| N(1)-N(2) | 1.302(3) |
| N(1)-O(3) | 1.253(2) |
| C(1)-C(2) | 1.391(3) |
| C(1)-C(6) | 1.401(3) |

|           |          |
|-----------|----------|
| O(2)-N(5) | 1.224(3) |
| N(2)-C(8) | 1.378(3) |
| C(2)-H(2) | 0.9500   |
| C(2)-C(3) | 1.375(3) |
| N(3)-O(4) | 1.375(3) |
| N(3)-C(8) | 1.313(3) |
| C(3)-C(4) | 1.397(3) |
| C(3)-N(5) | 1.472(2) |
| O(4)-N(4) | 1.475(2) |
| N(4)-O(5) | 1.221(3) |
| N(4)-C(7) | 1.322(3) |
| C(4)-H(4) | 0.9500   |
| C(4)-C(5) | 1.383(3) |
| C(5)-H(5) | 0.9500   |
| C(5)-C(6) | 1.399(3) |
| C(6)-C(7) | 1.427(3) |
| C(7)-C(8) | 1.403(3) |

|                |            |
|----------------|------------|
| N(2)-N(1)-C(1) | 124.65(17) |
| O(3)-N(1)-C(1) | 117.07(16) |
| O(3)-N(1)-N(2) | 118.28(18) |
| C(2)-C(1)-N(1) | 117.53(17) |
| C(2)-C(1)-C(6) | 121.45(18) |
| C(6)-C(1)-N(1) | 121.00(17) |
| N(1)-N(2)-C(8) | 114.89(18) |
| C(1)-C(2)-H(2) | 121.7      |
| C(3)-C(2)-C(1) | 116.64(18) |
| C(3)-C(2)-H(2) | 121.7      |
| C(8)-N(3)-O(4) | 105.20(19) |
| C(2)-C(3)-C(4) | 123.84(18) |
| C(2)-C(3)-N(5) | 118.01(16) |
| C(4)-C(3)-N(5) | 118.12(18) |
| N(3)-O(4)-N(4) | 108.80(14) |
| O(5)-N(4)-O(4) | 118.18(16) |
| O(5)-N(4)-C(7) | 136.48(19) |
| C(7)-N(4)-O(4) | 105.32(17) |
| C(3)-C(4)-H(4) | 120.7      |
| C(5)-C(4)-C(3) | 118.6(2)   |
| C(5)-C(4)-H(4) | 120.7      |
| O(1)-N(5)-C(3) | 117.64(17) |

|                |            |
|----------------|------------|
| O(2)-N(5)-O(1) | 124.37(17) |
| O(2)-N(5)-C(3) | 117.98(17) |
| C(4)-C(5)-H(5) | 120.3      |
| C(4)-C(5)-C(6) | 119.50(18) |
| C(6)-C(5)-H(5) | 120.3      |
| C(1)-C(6)-C(7) | 113.87(18) |
| C(5)-C(6)-C(1) | 119.92(18) |
| C(5)-C(6)-C(7) | 126.19(18) |
| N(4)-C(7)-C(6) | 131.8(2)   |
| N(4)-C(7)-C(8) | 107.52(18) |
| C(8)-C(7)-C(6) | 120.59(18) |
| N(2)-C(8)-C(7) | 124.89(18) |
| N(3)-C(8)-N(2) | 121.9(2)   |
| N(3)-C(8)-C(7) | 113.2(2)   |

**Table S22** Anisotropic displacement parameters ( $\text{\AA}^2 \times 10^3$ ) for CCDC 2288837. The anisotropic displacement factor exponent takes the form:  $-2\pi^2[h^2 a^{*2}U^{11} + \dots + 2 h k a^* b^* U^{12}]$

|      | U <sup>11</sup> | U <sup>22</sup> | U <sup>33</sup> | U <sup>23</sup> | U <sup>13</sup> | U <sup>12</sup> |
|------|-----------------|-----------------|-----------------|-----------------|-----------------|-----------------|
| O(1) | 24(1)           | 19(1)           | 23(1)           | 4(1)            | -2(1)           | -4(1)           |
| N(1) | 18(1)           | 19(1)           | 17(1)           | 1(1)            | 0(1)            | 4(1)            |
| C(1) | 17(1)           | 18(1)           | 15(1)           | 0(1)            | 0(1)            | 5(1)            |
| O(2) | 25(1)           | 23(1)           | 19(1)           | 2(1)            | -6(1)           | -1(1)           |
| N(2) | 19(1)           | 25(1)           | 20(1)           | -2(1)           | -4(1)           | 5(1)            |
| C(2) | 17(1)           | 17(1)           | 17(1)           | 1(1)            | 2(1)            | 2(1)            |
| N(3) | 22(1)           | 29(1)           | 28(1)           | -3(1)           | -4(1)           | 1(1)            |
| O(3) | 25(1)           | 22(1)           | 20(1)           | 5(1)            | -1(1)           | 3(1)            |
| C(3) | 16(1)           | 16(1)           | 17(1)           | -1(1)           | 1(1)            | 1(1)            |
| O(4) | 21(1)           | 30(1)           | 29(1)           | -4(1)           | -5(1)           | -6(1)           |
| N(4) | 18(1)           | 24(1)           | 23(1)           | -3(1)           | 0(1)            | -2(1)           |
| C(4) | 21(1)           | 18(1)           | 17(1)           | 1(1)            | 1(1)            | 1(1)            |
| N(5) | 16(1)           | 16(1)           | 19(1)           | 1(1)            | -1(1)           | 2(1)            |
| O(5) | 29(1)           | 30(1)           | 28(1)           | 4(1)            | 3(1)            | -10(1)          |
| C(5) | 21(1)           | 16(1)           | 18(1)           | 1(1)            | 1(1)            | 1(1)            |
| C(6) | 16(1)           | 18(1)           | 17(1)           | -1(1)           | 3(1)            | 2(1)            |
| C(7) | 17(1)           | 18(1)           | 21(1)           | -3(1)           | 2(1)            | 1(1)            |
| C(8) | 17(1)           | 21(1)           | 21(1)           | -4(1)           | 0(1)            | 3(1)            |

**Table S23** Hydrogen coordinates ( $\times 10^4$ ) and isotropic displacement parameters ( $\text{\AA}^2 \times 10^3$ ) for CCDC 2288837

|      | x    | y    | z    | U(eq) |
|------|------|------|------|-------|
| H(2) | 2923 | 4295 | 6282 | 20    |
| H(4) | 2631 | 6619 | 994  | 22    |
| H(5) | 3814 | 7959 | 2299 | 22    |

**Table S24** Torsion angles [ $^\circ$ ] for CCDC 2288837

|                     |             |
|---------------------|-------------|
| N(1)-C(1)-C(2)-C(3) | -178.30(16) |
| N(1)-C(1)-C(6)-C(5) | -179.18(16) |
| N(1)-C(1)-C(6)-C(7) | 2.3(2)      |
| N(1)-N(2)-C(8)-N(3) | -174.78(18) |
| N(1)-N(2)-C(8)-C(7) | 3.4(3)      |
| C(1)-N(1)-N(2)-C(8) | -2.2(3)     |
| C(1)-C(2)-C(3)-C(4) | -3.0(3)     |
| C(1)-C(2)-C(3)-N(5) | 174.83(16)  |
| C(1)-C(6)-C(7)-N(4) | 175.2(2)    |
| C(1)-C(6)-C(7)-C(8) | -1.3(2)     |
| N(2)-N(1)-C(1)-C(2) | 177.86(17)  |
| N(2)-N(1)-C(1)-C(6) | -0.6(3)     |
| C(2)-C(1)-C(6)-C(5) | 2.5(3)      |
| C(2)-C(1)-C(6)-C(7) | -176.08(17) |
| C(2)-C(3)-C(4)-C(5) | 3.3(3)      |
| C(2)-C(3)-N(5)-O(1) | 6.3(2)      |
| C(2)-C(3)-N(5)-O(2) | -172.77(16) |
| N(3)-O(4)-N(4)-O(5) | -178.67(18) |
| N(3)-O(4)-N(4)-C(7) | -0.1(2)     |
| O(3)-N(1)-C(1)-C(2) | -3.0(2)     |
| O(3)-N(1)-C(1)-C(6) | 178.63(16)  |
| O(3)-N(1)-N(2)-C(8) | 178.58(16)  |
| C(3)-C(4)-C(5)-C(6) | -0.5(3)     |
| O(4)-N(3)-C(8)-N(2) | 178.87(17)  |
| O(4)-N(3)-C(8)-C(7) | 0.5(2)      |
| O(4)-N(4)-C(7)-C(6) | -176.43(18) |
| O(4)-N(4)-C(7)-C(8) | 0.4(2)      |

|                     |             |
|---------------------|-------------|
| N(4)-C(7)-C(8)-N(2) | -178.90(18) |
| N(4)-C(7)-C(8)-N(3) | -0.6(2)     |
| C(4)-C(3)-N(5)-O(1) | -175.73(17) |
| C(4)-C(3)-N(5)-O(2) | 5.2(3)      |
| C(4)-C(5)-C(6)-C(1) | -2.2(3)     |
| C(4)-C(5)-C(6)-C(7) | 176.12(18)  |
| N(5)-C(3)-C(4)-C(5) | -174.59(16) |
| O(5)-N(4)-C(7)-C(6) | 1.7(4)      |
| O(5)-N(4)-C(7)-C(8) | 178.6(2)    |
| C(5)-C(6)-C(7)-N(4) | -3.2(3)     |
| C(5)-C(6)-C(7)-C(8) | -179.69(18) |
| C(6)-C(1)-C(2)-C(3) | 0.1(3)      |
| C(6)-C(7)-C(8)-N(2) | -1.6(3)     |
| C(6)-C(7)-C(8)-N(3) | 176.64(18)  |
| C(8)-N(3)-O(4)-N(4) | -0.3(2)     |

---

### X-ray experiment details for compound 3

**Table S25** Atomic coordinates ( $\times 10^4$ ) and equivalent isotropic displacement parameters ( $\text{\AA}^2 \times 10^3$ ) for CCDC 2288835.  $U(\text{eq})$  is defined as one third of the trace of the orthogonalized  $U^{ij}$  tensor

|       | x       | y       | z       | $U(\text{eq})$ |
|-------|---------|---------|---------|----------------|
| O(2)  | 6128(1) | 8833(2) | 6833(3) | 35(1)          |
| O(6)  | 3895(1) | 4574(1) | 9105(2) | 25(1)          |
| O(15) | 1696(1) | 3646(1) | 3766(3) | 26(1)          |
| O(16) | 1718(1) | 4782(1) | 886(3)  | 32(1)          |
| N(1)  | 5459(1) | 8676(2) | 5252(3) | 29(1)          |
| N(3)  | 6025(1) | 7911(2) | 8420(3) | 32(1)          |
| N(5)  | 4949(1) | 6165(2) | 9012(3) | 25(1)          |
| N(6)  | 4246(1) | 5546(2) | 8153(3) | 21(1)          |
| N(14) | 1988(1) | 4560(1) | 2653(3) | 21(1)          |
| C(4)  | 5295(1) | 7205(2) | 7831(3) | 24(1)          |
| C(7)  | 3830(1) | 5903(2) | 6146(3) | 18(1)          |
| C(8)  | 3101(1) | 5103(2) | 5430(3) | 19(1)          |
| C(9)  | 2728(1) | 5435(2) | 3514(3) | 19(1)          |
| C(10) | 3014(1) | 6524(2) | 2327(3) | 22(1)          |
| C(11) | 3741(1) | 7305(2) | 3072(3) | 22(1)          |
| C(12) | 4164(1) | 6986(2) | 4980(3) | 20(1)          |
| C(13) | 4953(1) | 7669(2) | 5902(3) | 22(1)          |

---

**Table S26** Bond lengths [Å] and angles [°] for CCDC 2288835

---

|                   |            |
|-------------------|------------|
| O(2)-N(1)         | 1.399(2)   |
| O(2)-N(3)         | 1.378(3)   |
| O(6)-N(6)         | 1.251(2)   |
| O(15)-N(14)       | 1.230(2)   |
| O(16)-N(14)       | 1.213(2)   |
| N(1)-C(13)        | 1.307(2)   |
| N(3)-C(4)         | 1.314(2)   |
| N(5)-N(6)         | 1.301(2)   |
| N(5)-C(4)         | 1.377(3)   |
| N(6)-C(7)         | 1.457(2)   |
| N(14)-C(9)        | 1.478(2)   |
| C(4)-C(13)        | 1.404(3)   |
| C(7)-C(8)         | 1.390(2)   |
| C(7)-C(12)        | 1.398(3)   |
| C(8)-H(8)         | 0.9500     |
| C(8)-C(9)         | 1.376(3)   |
| C(9)-C(10)        | 1.389(3)   |
| C(10)-H(10)       | 0.9500     |
| C(10)-C(11)       | 1.383(3)   |
| C(11)-H(11)       | 0.9500     |
| C(11)-C(12)       | 1.397(3)   |
| C(12)-C(13)       | 1.444(2)   |
| N(3)-O(2)-N(1)    | 112.52(13) |
| C(13)-N(1)-O(2)   | 103.56(17) |
| C(4)-N(3)-O(2)    | 103.50(17) |
| N(6)-N(5)-C(4)    | 113.92(17) |
| O(6)-N(6)-N(5)    | 118.31(16) |
| O(6)-N(6)-C(7)    | 117.01(15) |
| N(5)-N(6)-C(7)    | 124.68(16) |
| O(15)-N(14)-C(9)  | 117.80(15) |
| O(16)-N(14)-O(15) | 124.52(16) |
| O(16)-N(14)-C(9)  | 117.68(15) |
| N(3)-C(4)-N(5)    | 122.25(19) |
| N(3)-C(4)-C(13)   | 110.47(18) |
| N(5)-C(4)-C(13)   | 127.28(17) |
| C(8)-C(7)-N(6)    | 116.98(16) |
| C(8)-C(7)-C(12)   | 121.72(17) |
| C(12)-C(7)-N(6)   | 121.29(16) |



|                   |            |
|-------------------|------------|
| C(7)-C(8)-H(8)    | 121.8      |
| C(9)-C(8)-C(7)    | 116.39(16) |
| C(9)-C(8)-H(8)    | 121.8      |
| C(8)-C(9)-N(14)   | 117.75(15) |
| C(8)-C(9)-C(10)   | 124.07(17) |
| C(10)-C(9)-N(14)  | 118.17(16) |
| C(9)-C(10)-H(10)  | 120.8      |
| C(11)-C(10)-C(9)  | 118.41(18) |
| C(11)-C(10)-H(10) | 120.8      |
| C(10)-C(11)-H(11) | 120.1      |
| C(10)-C(11)-C(12) | 119.74(17) |
| C(12)-C(11)-H(11) | 120.1      |
| C(7)-C(12)-C(13)  | 114.55(17) |
| C(11)-C(12)-C(7)  | 119.61(16) |
| C(11)-C(12)-C(13) | 125.83(17) |
| N(1)-C(13)-C(4)   | 109.94(17) |
| N(1)-C(13)-C(12)  | 131.81(19) |
| C(4)-C(13)-C(12)  | 118.24(16) |

---

**Table S27** Anisotropic displacement parameters ( $\text{\AA}^2 \times 10^3$ ) for CCDC 2288835. The anisotropic displacement factor exponent takes the form:  $-2\pi^2[h^2 a^{*2}U^{11} + \dots + 2 h k a^* b^* U^{12}]$

|       | $U^{11}$ | $U^{22}$ | $U^{33}$ | $U^{23}$ | $U^{13}$ | $U^{12}$ |
|-------|----------|----------|----------|----------|----------|----------|
| O(2)  | 25(1)    | 41(1)    | 38(1)    | -6(1)    | -3(1)    | -12(1)   |
| O(6)  | 29(1)    | 24(1)    | 24(1)    | 6(1)     | -3(1)    | -1(1)    |
| O(15) | 28(1)    | 22(1)    | 26(1)    | 5(1)     | -3(1)    | -6(1)    |
| O(16) | 41(1)    | 30(1)    | 25(1)    | 7(1)     | -12(1)   | -10(1)   |
| N(1)  | 26(1)    | 31(1)    | 31(1)    | -5(1)    | 2(1)     | -7(1)    |
| N(3)  | 25(1)    | 35(1)    | 37(1)    | -5(1)    | -4(1)    | -5(1)    |
| N(5)  | 21(1)    | 27(1)    | 27(1)    | -2(1)    | -6(1)    | 3(1)     |
| N(6)  | 20(1)    | 23(1)    | 21(1)    | 0(1)     | -2(1)    | 3(1)     |
| N(14) | 21(1)    | 19(1)    | 24(1)    | 0(1)     | -3(1)    | -1(1)    |
| C(4)  | 18(1)    | 26(1)    | 29(1)    | -5(1)    | 0(1)     | 2(1)     |
| C(7)  | 18(1)    | 19(1)    | 17(1)    | -1(1)    | 1(1)     | 4(1)     |
| C(8)  | 18(1)    | 18(1)    | 21(1)    | 2(1)     | 2(1)     | 1(1)     |
| C(9)  | 18(1)    | 18(1)    | 21(1)    | -2(1)    | 1(1)     | 0(1)     |
| C(10) | 26(1)    | 20(1)    | 21(1)    | 1(1)     | -2(1)    | 1(1)     |
| C(11) | 28(1)    | 20(1)    | 20(1)    | 1(1)     | 3(1)     | -2(1)    |
| C(12) | 19(1)    | 19(1)    | 23(1)    | -2(1)    | 3(1)     | 1(1)     |
| C(13) | 20(1)    | 21(1)    | 24(1)    | -4(1)    | 5(1)     | 0(1)     |

**Table S28** Hydrogen coordinates ( $\times 10^4$ ) and isotropic displacement parameters ( $\text{\AA}^2 \times 10^3$ ) for CCDC 2288835

|       | x    | y    | z    | U(eq) |
|-------|------|------|------|-------|
| H(8)  | 2874 | 4367 | 6222 | 23    |
| H(10) | 2719 | 6729 | 1033 | 27    |
| H(11) | 3952 | 8055 | 2290 | 27    |

**Table S29** Torsion angles [ $^\circ$ ] for CCDC 2288835

|                       |             |
|-----------------------|-------------|
| O(2)-N(1)-C(13)-C(4)  | -0.05(19)   |
| O(2)-N(1)-C(13)-C(12) | -178.56(18) |
| O(2)-N(3)-C(4)-N(5)   | -179.61(17) |

|                         |             |
|-------------------------|-------------|
| O(2)-N(3)-C(4)-C(13)    | 0.6(2)      |
| O(6)-N(6)-C(7)-C(8)     | -2.2(2)     |
| O(6)-N(6)-C(7)-C(12)    | 178.94(15)  |
| O(15)-N(14)-C(9)-C(8)   | 5.6(2)      |
| O(15)-N(14)-C(9)-C(10)  | -175.60(17) |
| O(16)-N(14)-C(9)-C(8)   | -173.56(17) |
| O(16)-N(14)-C(9)-C(10)  | 5.3(2)      |
| N(1)-O(2)-N(3)-C(4)     | -0.6(2)     |
| N(3)-O(2)-N(1)-C(13)    | 0.4(2)      |
| N(3)-C(4)-C(13)-N(1)    | -0.3(2)     |
| N(3)-C(4)-C(13)-C(12)   | 178.40(16)  |
| N(5)-N(6)-C(7)-C(8)     | 177.92(16)  |
| N(5)-N(6)-C(7)-C(12)    | -0.9(3)     |
| N(5)-C(4)-C(13)-N(1)    | 179.84(17)  |
| N(5)-C(4)-C(13)-C(12)   | -1.4(3)     |
| N(6)-N(5)-C(4)-N(3)     | -177.55(17) |
| N(6)-N(5)-C(4)-C(13)    | 2.3(3)      |
| N(6)-C(7)-C(8)-C(9)     | -178.74(15) |
| N(6)-C(7)-C(12)-C(11)   | -179.37(15) |
| N(6)-C(7)-C(12)-C(13)   | 1.7(2)      |
| N(14)-C(9)-C(10)-C(11)  | -176.56(16) |
| C(4)-N(5)-N(6)-O(6)     | 179.12(15)  |
| C(4)-N(5)-N(6)-C(7)     | -1.1(2)     |
| C(7)-C(8)-C(9)-N(14)    | 176.62(15)  |
| C(7)-C(8)-C(9)-C(10)    | -2.2(3)     |
| C(7)-C(12)-C(13)-N(1)   | 177.76(18)  |
| C(7)-C(12)-C(13)-C(4)   | -0.6(2)     |
| C(8)-C(7)-C(12)-C(11)   | 1.9(3)      |
| C(8)-C(7)-C(12)-C(13)   | -177.06(16) |
| C(8)-C(9)-C(10)-C(11)   | 2.2(3)      |
| C(9)-C(10)-C(11)-C(12)  | -0.1(3)     |
| C(10)-C(11)-C(12)-C(7)  | -1.8(3)     |
| C(10)-C(11)-C(12)-C(13) | 176.97(17)  |
| C(11)-C(12)-C(13)-N(1)  | -1.1(3)     |
| C(11)-C(12)-C(13)-C(4)  | -179.50(16) |
| C(12)-C(7)-C(8)-C(9)    | 0.1(2)      |

---

### X-ray experiment details for compound 5

**Table S30** Atomic coordinates ( $\times 10^4$ ) and equivalent isotropic displacement parameters ( $\text{\AA}^2 \times 10^3$ ) for CCDC 2288836.  $U(\text{eq})$  is defined as one third of the trace of the orthogonalized  $U^{ij}$  tensor

|      | x       | y       | z       | $U(\text{eq})$ |
|------|---------|---------|---------|----------------|
| O(1) | 4328(1) | 2111(1) | 6870(1) | 20(1)          |
| O(2) | 8914(1) | 5120(1) | 6669(1) | 20(1)          |
| O(3) | 4971(1) | 2045(1) | 4278(1) | 20(1)          |
| O(4) | 3581(1) | 3318(1) | 3753(1) | 21(1)          |
| N(1) | 4453(2) | 2399(1) | 6013(1) | 18(1)          |
| N(2) | 5368(2) | 2641(1) | 7383(1) | 20(1)          |
| N(3) | 7253(1) | 3937(1) | 7113(1) | 18(1)          |
| N(4) | 7847(1) | 4497(1) | 6495(1) | 15(1)          |
| N(5) | 4705(1) | 2978(1) | 4142(1) | 15(1)          |
| C(1) | 6114(2) | 3257(1) | 6850(1) | 16(1)          |
| C(2) | 7358(2) | 4450(1) | 5595(1) | 14(1)          |
| C(3) | 8050(2) | 5150(1) | 5023(1) | 16(1)          |
| C(4) | 7614(2) | 5136(1) | 4171(1) | 16(1)          |
| C(5) | 6491(2) | 4429(1) | 3876(1) | 16(1)          |
| C(6) | 5839(2) | 3742(1) | 4457(1) | 14(1)          |
| C(7) | 6231(2) | 3728(1) | 5329(1) | 14(1)          |
| C(8) | 5558(2) | 3100(1) | 6005(1) | 15(1)          |

**Table S31** Bond lengths [ $\text{\AA}$ ] and angles [ $^\circ$ ] for CCDC 2288836

|           |            |
|-----------|------------|
| O(1)-N(1) | 1.3880(16) |
| O(1)-N(2) | 1.3796(17) |

|                |            |
|----------------|------------|
| O(2)-N(4)      | 1.2461(16) |
| O(3)-N(5)      | 1.2256(17) |
| O(4)-N(5)      | 1.2251(17) |
| N(1)-C(8)      | 1.307(2)   |
| N(2)-C(1)      | 1.312(2)   |
| N(3)-N(4)      | 1.3029(18) |
| N(3)-C(1)      | 1.373(2)   |
| N(4)-C(2)      | 1.4654(17) |
| N(5)-C(6)      | 1.4664(18) |
| C(1)-C(8)      | 1.415(2)   |
| C(2)-C(3)      | 1.394(2)   |
| C(2)-C(7)      | 1.402(2)   |
| C(3)-H(3)      | 0.95(2)    |
| C(3)-C(4)      | 1.380(2)   |
| C(4)-H(4)      | 0.99(2)    |
| C(4)-C(5)      | 1.400(2)   |
| C(5)-H(5)      | 0.96(2)    |
| C(5)-C(6)      | 1.378(2)   |
| C(6)-C(7)      | 1.4002(19) |
| C(7)-C(8)      | 1.4433(19) |
|                |            |
| N(2)-O(1)-N(1) | 112.18(10) |
| C(8)-N(1)-O(1) | 104.24(11) |
| C(1)-N(2)-O(1) | 104.23(12) |
| N(4)-N(3)-C(1) | 114.00(12) |
| O(2)-N(4)-N(3) | 118.60(12) |
| O(2)-N(4)-C(2) | 116.66(12) |
| N(3)-N(4)-C(2) | 124.74(12) |

|                |            |
|----------------|------------|
| O(3)-N(5)-C(6) | 117.18(12) |
| O(4)-N(5)-O(3) | 125.15(12) |
| O(4)-N(5)-C(6) | 117.66(12) |
| N(2)-C(1)-N(3) | 122.68(13) |
| N(2)-C(1)-C(8) | 109.69(13) |
| N(3)-C(1)-C(8) | 127.62(13) |
| C(3)-C(2)-N(4) | 117.43(13) |
| C(3)-C(2)-C(7) | 121.88(13) |
| C(7)-C(2)-N(4) | 120.69(13) |
| C(2)-C(3)-H(3) | 119.8(14)  |
| C(4)-C(3)-C(2) | 119.24(13) |
| C(4)-C(3)-H(3) | 121.0(14)  |
| C(3)-C(4)-H(4) | 122.1(13)  |
| C(3)-C(4)-C(5) | 120.91(14) |
| C(5)-C(4)-H(4) | 116.9(13)  |
| C(4)-C(5)-H(5) | 119.8(13)  |
| C(6)-C(5)-C(4) | 118.36(13) |
| C(6)-C(5)-H(5) | 121.8(13)  |
| C(5)-C(6)-N(5) | 118.33(13) |
| C(5)-C(6)-C(7) | 123.10(13) |
| C(7)-C(6)-N(5) | 118.55(12) |
| C(2)-C(7)-C(8) | 115.30(13) |
| C(6)-C(7)-C(2) | 116.49(13) |
| C(6)-C(7)-C(8) | 128.11(13) |
| N(1)-C(8)-C(1) | 109.65(13) |
| N(1)-C(8)-C(7) | 132.77(13) |
| C(1)-C(8)-C(7) | 117.55(13) |

---

**Table S32** Anisotropic displacement parameters ( $\text{\AA}^2 \times 10^3$ ) for CCDC 2288836. The anisotropic displacement factor exponent takes the form:  $-2\pi^2[h^2 a^{*2}U^{11} + \dots + 2 h k a^* b^* U^{12}]$

|      | U <sup>11</sup> | U <sup>22</sup> | U <sup>33</sup> | U <sup>23</sup> | U <sup>13</sup> | U <sup>12</sup> |
|------|-----------------|-----------------|-----------------|-----------------|-----------------|-----------------|
| O(1) | 26(1)           | 19(1)           | 16(1)           | 2(1)            | 3(1)            | -4(1)           |
| O(2) | 18(1)           | 21(1)           | 21(1)           | -4(1)           | -4(1)           | -4(1)           |
| O(3) | 29(1)           | 11(1)           | 20(1)           | 1(1)            | -2(1)           | -3(1)           |
| O(4) | 15(1)           | 22(1)           | 24(1)           | -7(1)           | -4(1)           | 4(1)            |
| N(1) | 22(1)           | 16(1)           | 15(1)           | 2(1)            | 3(1)            | -1(1)           |
| N(2) | 23(1)           | 20(1)           | 16(1)           | 0(1)            | 2(1)            | 0(1)            |
| N(3) | 21(1)           | 19(1)           | 14(1)           | -1(1)           | 0(1)            | 1(1)            |
| N(4) | 15(1)           | 15(1)           | 16(1)           | -3(1)           | 0(1)            | 1(1)            |
| N(5) | 15(1)           | 15(1)           | 14(1)           | -2(1)           | 2(1)            | -1(1)           |
| C(1) | 18(1)           | 15(1)           | 16(1)           | -1(1)           | 2(1)            | 3(1)            |
| C(2) | 13(1)           | 14(1)           | 15(1)           | -2(1)           | 0(1)            | 3(1)            |
| C(3) | 14(1)           | 13(1)           | 21(1)           | -1(1)           | 2(1)            | 1(1)            |
| C(4) | 16(1)           | 14(1)           | 19(1)           | 1(1)            | 2(1)            | 0(1)            |
| C(5) | 18(1)           | 14(1)           | 15(1)           | 1(1)            | 1(1)            | 2(1)            |
| C(6) | 14(1)           | 12(1)           | 16(1)           | -2(1)           | -1(1)           | 1(1)            |
| C(7) | 14(1)           | 12(1)           | 16(1)           | 0(1)            | 1(1)            | 3(1)            |
| C(8) | 16(1)           | 13(1)           | 16(1)           | 0(1)            | 1(1)            | 2(1)            |

**Table S33** Hydrogen coordinates ( $\times 10^4$ ) and isotropic displacement parameters ( $\text{\AA}^2 \times 10^3$ ) for CCDC 2288836

---

|      | x        | y        | z        | U(eq) |
|------|----------|----------|----------|-------|
| H(3) | 8800(30) | 5634(19) | 5225(15) | 29(5) |
| H(4) | 8060(20) | 5627(18) | 3741(15) | 25(5) |
| H(5) | 6220(20) | 4417(17) | 3278(14) | 23(5) |

---

**Table S34** Torsion angles [ $^\circ$ ] for CCDC 2288836

---

|                     |             |
|---------------------|-------------|
| O(1)-N(1)-C(8)-C(1) | -0.45(15)   |
| O(1)-N(1)-C(8)-C(7) | -178.17(15) |
| O(1)-N(2)-C(1)-N(3) | 179.09(12)  |
| O(1)-N(2)-C(1)-C(8) | -0.89(15)   |
| O(2)-N(4)-C(2)-C(3) | -4.18(18)   |
| O(2)-N(4)-C(2)-C(7) | 176.15(12)  |
| O(3)-N(5)-C(6)-C(5) | 123.47(14)  |
| O(3)-N(5)-C(6)-C(7) | -55.33(17)  |
| O(4)-N(5)-C(6)-C(5) | -55.41(17)  |
| O(4)-N(5)-C(6)-C(7) | 125.79(14)  |
| N(1)-O(1)-N(2)-C(1) | 0.63(15)    |
| N(2)-O(1)-N(1)-C(8) | -0.10(15)   |
| N(2)-C(1)-C(8)-N(1) | 0.89(17)    |
| N(2)-C(1)-C(8)-C(7) | 179.01(12)  |
| N(3)-N(4)-C(2)-C(3) | 176.15(13)  |



|                     |             |
|---------------------|-------------|
| N(3)-N(4)-C(2)-C(7) | -3.5(2)     |
| N(3)-C(1)-C(8)-N(1) | -179.08(14) |
| N(3)-C(1)-C(8)-C(7) | -1.0(2)     |
| N(4)-N(3)-C(1)-N(2) | -178.98(13) |
| N(4)-N(3)-C(1)-C(8) | 1.0(2)      |
| N(4)-C(2)-C(3)-C(4) | -179.54(12) |
| N(4)-C(2)-C(7)-C(6) | 179.93(11)  |
| N(4)-C(2)-C(7)-C(8) | 3.27(19)    |
| N(5)-C(6)-C(7)-C(2) | 177.94(11)  |
| N(5)-C(6)-C(7)-C(8) | -5.9(2)     |
| C(1)-N(3)-N(4)-O(2) | -178.43(12) |
| C(1)-N(3)-N(4)-C(2) | 1.24(19)    |
| C(2)-C(3)-C(4)-C(5) | 0.0(2)      |
| C(2)-C(7)-C(8)-N(1) | 176.32(15)  |
| C(2)-C(7)-C(8)-C(1) | -1.26(19)   |
| C(3)-C(2)-C(7)-C(6) | 0.3(2)      |
| C(3)-C(2)-C(7)-C(8) | -176.39(12) |
| C(3)-C(4)-C(5)-C(6) | -0.4(2)     |
| C(4)-C(5)-C(6)-N(5) | -177.85(12) |
| C(4)-C(5)-C(6)-C(7) | 0.9(2)      |
| C(5)-C(6)-C(7)-C(2) | -0.8(2)     |
| C(5)-C(6)-C(7)-C(8) | 175.37(13)  |
| C(6)-C(7)-C(8)-N(1) | 0.1(3)      |
| C(6)-C(7)-C(8)-C(1) | -177.47(13) |
| C(7)-C(2)-C(3)-C(4) | 0.1(2)      |

---

## X-ray experiment details for compound 8

**Table S35** Atomic coordinates ( $\times 10^4$ ) and equivalent isotropic displacement parameters ( $\text{\AA}^2 \times 10^3$ ) for CCDC 2295832.  $U(\text{eq})$  is defined as one third of the trace of the orthogonalized  $U^{ij}$  tensor

|       | x       | y        | z       | U(eq) |
|-------|---------|----------|---------|-------|
| O(1)  | 3826(2) | 4257(2)  | 7343(2) | 27(1) |
| O(5)  | 7160(2) | 8181(2)  | 5790(3) | 38(1) |
| O(15) | 8355(2) | 4227(2)  | 4247(3) | 44(1) |
| O(16) | 7881(2) | 2542(3)  | 2640(3) | 44(1) |
| O(18) | 5233(2) | -1339(2) | 3752(2) | 33(1) |
| O(19) | 3954(2) | -718(2)  | 5177(3) | 38(1) |
| N(1)  | 4674(2) | 4782(3)  | 6834(2) | 24(1) |
| N(2)  | 4994(2) | 6210(3)  | 7180(3) | 30(1) |
| N(4)  | 6292(2) | 8147(3)  | 6691(3) | 36(1) |
| N(6)  | 7303(2) | 6744(3)  | 5104(3) | 34(1) |
| N(14) | 7720(2) | 3286(3)  | 3709(3) | 30(1) |
| N(17) | 4787(2) | -418(3)  | 4565(3) | 28(1) |
| C(3)  | 5905(2) | 6693(3)  | 6515(3) | 29(1) |
| C(7)  | 6534(2) | 5808(3)  | 5550(3) | 27(1) |
| C(8)  | 6209(2) | 4166(3)  | 5251(3) | 23(1) |
| C(9)  | 6703(2) | 2986(3)  | 4421(3) | 25(1) |
| C(10) | 6257(2) | 1494(3)  | 4189(3) | 25(1) |
| C(11) | 5296(2) | 1151(3)  | 4827(3) | 23(1) |
| C(12) | 4774(2) | 2218(3)  | 5681(3) | 23(1) |
| C(13) | 5243(2) | 3710(3)  | 5883(3) | 22(1) |

**Table S36** Bond lengths [ $\text{\AA}$ ] and angles [ $^\circ$ ] for CCDC 2295832

|             |          |
|-------------|----------|
| O(1)-N(1)   | 1.248(3) |
| O(5)-N(4)   | 1.392(4) |
| O(5)-N(6)   | 1.375(3) |
| O(15)-N(14) | 1.229(4) |
| O(16)-N(14) | 1.216(4) |
| O(18)-N(17) | 1.228(3) |
| O(19)-N(17) | 1.225(3) |
| N(1)-N(2)   | 1.296(3) |
| N(1)-C(13)  | 1.462(3) |

|                   |          |
|-------------------|----------|
| N(2)-C(3)         | 1.368(4) |
| N(4)-C(3)         | 1.313(4) |
| N(6)-C(7)         | 1.310(4) |
| N(14)-C(9)        | 1.468(3) |
| N(17)-C(11)       | 1.473(3) |
| C(3)-C(7)         | 1.422(4) |
| C(7)-C(8)         | 1.452(3) |
| C(8)-C(9)         | 1.407(4) |
| C(8)-C(13)        | 1.406(3) |
| C(9)-C(10)        | 1.378(4) |
| C(10)-H(10)       | 0.9500   |
| C(10)-C(11)       | 1.382(4) |
| C(11)-C(12)       | 1.374(4) |
| C(12)-H(12)       | 0.9500   |
| C(12)-C(13)       | 1.386(3) |
|                   |          |
| N(6)-O(5)-N(4)    | 112.5(2) |
| O(1)-N(1)-N(2)    | 118.9(2) |
| O(1)-N(1)-C(13)   | 116.6(2) |
| N(2)-N(1)-C(13)   | 124.5(2) |
| N(1)-N(2)-C(3)    | 114.0(2) |
| C(3)-N(4)-O(5)    | 103.1(2) |
| C(7)-N(6)-O(5)    | 105.2(2) |
| O(15)-N(14)-C(9)  | 118.2(3) |
| O(16)-N(14)-O(15) | 124.9(2) |
| O(16)-N(14)-C(9)  | 116.9(2) |
| O(18)-N(17)-C(11) | 117.6(2) |
| O(19)-N(17)-O(18) | 124.6(2) |
| O(19)-N(17)-C(11) | 117.9(2) |
| N(2)-C(3)-C(7)    | 128.0(2) |
| N(4)-C(3)-N(2)    | 121.1(3) |
| N(4)-C(3)-C(7)    | 110.8(3) |
| N(6)-C(7)-C(3)    | 108.3(2) |
| N(6)-C(7)-C(8)    | 134.4(3) |
| C(3)-C(7)-C(8)    | 117.3(2) |
| C(9)-C(8)-C(7)    | 130.0(2) |
| C(13)-C(8)-C(7)   | 114.2(2) |
| C(13)-C(8)-C(9)   | 115.9(2) |
| C(8)-C(9)-N(14)   | 121.9(2) |
| C(10)-C(9)-N(14)  | 115.4(2) |

|                   |          |
|-------------------|----------|
| C(10)-C(9)-C(8)   | 122.7(2) |
| C(9)-C(10)-H(10)  | 121.1    |
| C(9)-C(10)-C(11)  | 117.9(2) |
| C(11)-C(10)-H(10) | 121.1    |
| C(10)-C(11)-N(17) | 119.0(2) |
| C(12)-C(11)-N(17) | 117.9(2) |
| C(12)-C(11)-C(10) | 123.2(2) |
| C(11)-C(12)-H(12) | 121.3    |
| C(11)-C(12)-C(13) | 117.3(2) |
| C(13)-C(12)-H(12) | 121.3    |
| C(8)-C(13)-N(1)   | 121.8(2) |
| C(12)-C(13)-N(1)  | 115.1(2) |
| C(12)-C(13)-C(8)  | 123.1(2) |

**Table S37** Anisotropic displacement parameters ( $\text{\AA}^2 \times 10^3$ ) for CCDC 2295832. The anisotropic displacement factor exponent takes the form:  $-2\pi^2[h^2 a^{*2}U^{11} + \dots + 2 h k a^* b^* U^{12}]$

|       | U <sup>11</sup> | U <sup>22</sup> | U <sup>33</sup> | U <sup>23</sup> | U <sup>13</sup> | U <sup>12</sup> |
|-------|-----------------|-----------------|-----------------|-----------------|-----------------|-----------------|
| O(1)  | 27(1)           | 28(1)           | 26(1)           | -1(1)           | 6(1)            | -1(1)           |
| O(5)  | 32(1)           | 24(1)           | 59(2)           | 2(1)            | -6(1)           | -6(1)           |
| O(15) | 29(1)           | 32(1)           | 71(2)           | 3(1)            | 10(1)           | -3(1)           |
| O(16) | 37(1)           | 72(2)           | 25(1)           | 3(1)            | 11(1)           | 3(1)            |
| O(18) | 40(1)           | 28(1)           | 30(1)           | -10(1)          | 3(1)            | 4(1)            |
| O(19) | 34(1)           | 31(1)           | 48(2)           | -10(1)          | 10(1)           | -8(1)           |
| N(1)  | 28(1)           | 23(1)           | 21(1)           | -1(1)           | 0(1)            | 2(1)            |
| N(2)  | 35(1)           | 25(1)           | 31(1)           | -4(1)           | -2(1)           | -2(1)           |
| N(4)  | 35(1)           | 28(1)           | 45(2)           | -1(1)           | -4(1)           | -2(1)           |
| N(6)  | 30(1)           | 27(1)           | 44(2)           | 7(1)            | -4(1)           | -3(1)           |
| N(14) | 28(1)           | 32(1)           | 31(1)           | 11(1)           | 6(1)            | 4(1)            |
| N(17) | 28(1)           | 25(1)           | 30(1)           | -4(1)           | 1(1)            | 1(1)            |
| C(3)  | 33(1)           | 23(1)           | 30(2)           | 2(1)            | -4(1)           | 0(1)            |
| C(7)  | 27(1)           | 24(1)           | 30(2)           | 6(1)            | -6(1)           | -1(1)           |
| C(8)  | 26(1)           | 23(1)           | 22(1)           | 5(1)            | -1(1)           | 2(1)            |
| C(9)  | 23(1)           | 28(1)           | 22(1)           | 7(1)            | 1(1)            | 1(1)            |
| C(10) | 29(1)           | 26(1)           | 21(1)           | 2(1)            | 1(1)            | 5(1)            |
| C(11) | 29(1)           | 22(1)           | 19(1)           | 1(1)            | -2(1)           | 0(1)            |
| C(12) | 26(1)           | 22(1)           | 21(1)           | 4(1)            | 0(1)            | 2(1)            |
| C(13) | 25(1)           | 22(1)           | 19(1)           | 2(1)            | -3(1)           | 2(1)            |

**Table S38** Hydrogen coordinates ( $\times 10^4$ ) and isotropic displacement parameters ( $\text{\AA}^2 \times 10^3$ ) for CCDC 2295832

|       | x    | y    | z    | U(eq) |
|-------|------|------|------|-------|
| H(10) | 6600 | 726  | 3610 | 30    |
| H(12) | 4118 | 1944 | 6115 | 27    |

**Table S39** Torsion angles [ $^\circ$ ] for CCDC 2295832

|                         |           |
|-------------------------|-----------|
| O(1)-N(1)-N(2)-C(3)     | -177.2(2) |
| O(1)-N(1)-C(13)-C(8)    | -179.7(2) |
| O(1)-N(1)-C(13)-C(12)   | -1.0(3)   |
| O(5)-N(4)-C(3)-N(2)     | -176.6(3) |
| O(5)-N(4)-C(3)-C(7)     | 1.6(3)    |
| O(5)-N(6)-C(7)-C(3)     | 0.5(3)    |
| O(5)-N(6)-C(7)-C(8)     | 179.2(3)  |
| O(15)-N(14)-C(9)-C(8)   | 30.1(4)   |
| O(15)-N(14)-C(9)-C(10)  | -151.6(3) |
| O(16)-N(14)-C(9)-C(8)   | -151.7(3) |
| O(16)-N(14)-C(9)-C(10)  | 26.6(4)   |
| O(18)-N(17)-C(11)-C(10) | -2.0(4)   |
| O(18)-N(17)-C(11)-C(12) | 176.8(2)  |
| O(19)-N(17)-C(11)-C(10) | 177.6(3)  |
| O(19)-N(17)-C(11)-C(12) | -3.6(4)   |
| N(1)-N(2)-C(3)-N(4)     | 175.8(3)  |
| N(1)-N(2)-C(3)-C(7)     | -2.0(4)   |
| N(2)-N(1)-C(13)-C(8)    | -0.2(4)   |
| N(2)-N(1)-C(13)-C(12)   | 178.5(3)  |
| N(2)-C(3)-C(7)-N(6)     | 176.6(3)  |
| N(2)-C(3)-C(7)-C(8)     | -2.4(4)   |
| N(4)-O(5)-N(6)-C(7)     | 0.5(3)    |
| N(4)-C(3)-C(7)-N(6)     | -1.4(3)   |
| N(4)-C(3)-C(7)-C(8)     | 179.6(2)  |
| N(6)-O(5)-N(4)-C(3)     | -1.3(3)   |
| N(6)-C(7)-C(8)-C(9)     | 5.7(5)    |
| N(6)-C(7)-C(8)-C(13)    | -173.4(3) |
| N(14)-C(9)-C(10)-C(11)  | -179.6(2) |
| N(17)-C(11)-C(12)-C(13) | -178.0(2) |

|                         |           |
|-------------------------|-----------|
| C(3)-C(7)-C(8)-C(9)     | -175.7(3) |
| C(3)-C(7)-C(8)-C(13)    | 5.2(3)    |
| C(7)-C(8)-C(9)-N(14)    | 1.5(4)    |
| C(7)-C(8)-C(9)-C(10)    | -176.7(3) |
| C(7)-C(8)-C(13)-N(1)    | -4.2(3)   |
| C(7)-C(8)-C(13)-C(12)   | 177.2(2)  |
| C(8)-C(9)-C(10)-C(11)   | -1.3(4)   |
| C(9)-C(8)-C(13)-N(1)    | 176.5(2)  |
| C(9)-C(8)-C(13)-C(12)   | -2.1(4)   |
| C(9)-C(10)-C(11)-N(17)  | 178.3(2)  |
| C(9)-C(10)-C(11)-C(12)  | -0.4(4)   |
| C(10)-C(11)-C(12)-C(13) | 0.8(4)    |
| C(11)-C(12)-C(13)-N(1)  | -178.2(2) |
| C(11)-C(12)-C(13)-C(8)  | 0.5(4)    |
| C(13)-N(1)-N(2)-C(3)    | 3.3(4)    |
| C(13)-C(8)-C(9)-N(14)   | -179.4(2) |
| C(13)-C(8)-C(9)-C(10)   | 2.4(4)    |

**Table S40** Unit cell volume ( $V$ ), van der Waals volume ( $V_{\text{vdW}}$ ), Kitaigorodskii packin index (KPI), volume enclosed by the 0.001 a.u. isosurface of the electron density ( $V_{001}$ ), the biggest spherical void volume ( $V_{\text{void}}$ ) and crystal density at 100 K.

| Compound | $V, \text{\AA}^3$ | $Z$ | $V_{\text{vdW}}, \text{\AA}^3$ | KPI    | $V_{001}, \text{\AA}^3$ | $V_{\text{void}}, \text{\AA}^3$ | $d, \text{g cm}^{-3}$ |
|----------|-------------------|-----|--------------------------------|--------|-------------------------|---------------------------------|-----------------------|
| <b>1</b> | 769.42(2)         | 4   | 138.31                         | 71.82% | 193.8                   | 5.58                            | 1.624                 |
| <b>3</b> | 912.06(2)         | 4   | 162.40                         | 71.02% | 222.2                   | 4.19                            | 1.698                 |
| <b>5</b> | 1713.28(7)        | 8   | 162.77                         | 75.76% | 221.3                   | 2.14                            | 1.808                 |
| <b>6</b> | 924.783(13)       | 4   | 171.04                         | 73.69% | 232.0                   | 3.05                            | 1.790                 |
| <b>7</b> | 2400.54(4)        | 12  | 146.87                         | 73.37% | 203.6                   | 5.58                            | 1.695                 |
| <b>8</b> | 1000.81(3)        | 4   | 186.13                         | 74.13% | 250.1                   | 3.05                            | 1.846                 |

The molecular volume enclosed by the isosurface of the electron density ( $\rho(\mathbf{r})=0.001$  a.u.) is calculated using B3LYP/6-31G(d,p) wave function of the optimized molecule.

Kitaigorodskii packing indices<sup>8</sup> are calculated with Olex2 program<sup>4</sup>.

## References

- 1 Rigaku, CrysAlisPro Software System 2021.
- 2 G. M. Sheldrick, *Acta Crystallogr. Sect. A Found. Crystallogr.*, 2015, **71**, 3–8.
- 3 G. M. Sheldrick, *Acta Crystallogr. Sect. C Struct. Chem.*, 2015, **71**, 3–8.
- 4 O. V. Dolomanov, L. J. Bourhis, R. J. Gildea, J. A. K. Howard, and H. Puschmann, *J. Appl. Crystallogr.*, 2009, **42**, 339–341.
- 5 C. F. Macrae, P. R. Edgington, P. McCabe, E. Pidcock, G. P. Shields, R. Taylor, M. Towler, and J. Van De Streek, *J. Appl. Crystallogr.*, 2006, **39**, 453–457.
- 6 M. S. Klenov, V. P. Zelenov, A. M. Churakov, Y. A. Strelenko, and V. A. Tartakovsky, *Russ. Chem. Bull.*, 2011, **60**, 2040–2045.
- 7 V. P. Zelenov, A. A. Voronin, A. M. Churakov, M. S. Klenov, Y. A. Strelenko, and V. A. Tartakovsky, *Russ. Chem. Bull.*, 2011, **60**, 2046–2050.
- 8 A. I. Kitaigorodskii, *Molecular crystals and molecules*, Academic Press, New York, 1973.
